# Supplementary material for: Rhodium-Catalyzed Trans-Bis-Silylation Reactions of 2-Ethynyl-3-pentamethyldisilanylpyridines
Source: MDPI journal article supplement (doi:10.3390/molecules28083284), 2023-04-07
Supplement: s1 [file s1]

# Supplementary Materials

## Rhodium-catalyzed *trans*-bis-silylation reactions of 2-ethynyl-3-pentamethyldisilanylpyridines

Akinobu Naka,<sup>\*,1</sup> and Hisayoshi Kobayashi<sup>\*,2</sup>

<sup>1</sup>Department of Life Science, Kurashiki University of Science and the Arts, Nishinoura,  
Tsurajima-cho, Kurashiki, Okayama 712-8505, Japan

<sup>2</sup> Professor Emeritus Kyoto Institute of Technology, Matsugasaki, Kyoto 606-8585, Japan

### Contents

|                                                                                             |         |
|---------------------------------------------------------------------------------------------|---------|
| 1. NMR Spectra.....                                                                         | S2-S7   |
| 2. Optimized structures for all LM's and TS's for <i>trans</i> -bis-silylation product..... | S8-S22  |
| 3. Scheme S1.....                                                                           | S23     |
| 4. Optimized structures for all LM's and TS's for <i>cis</i> -bis-silylation product.....   | S24-S31 |

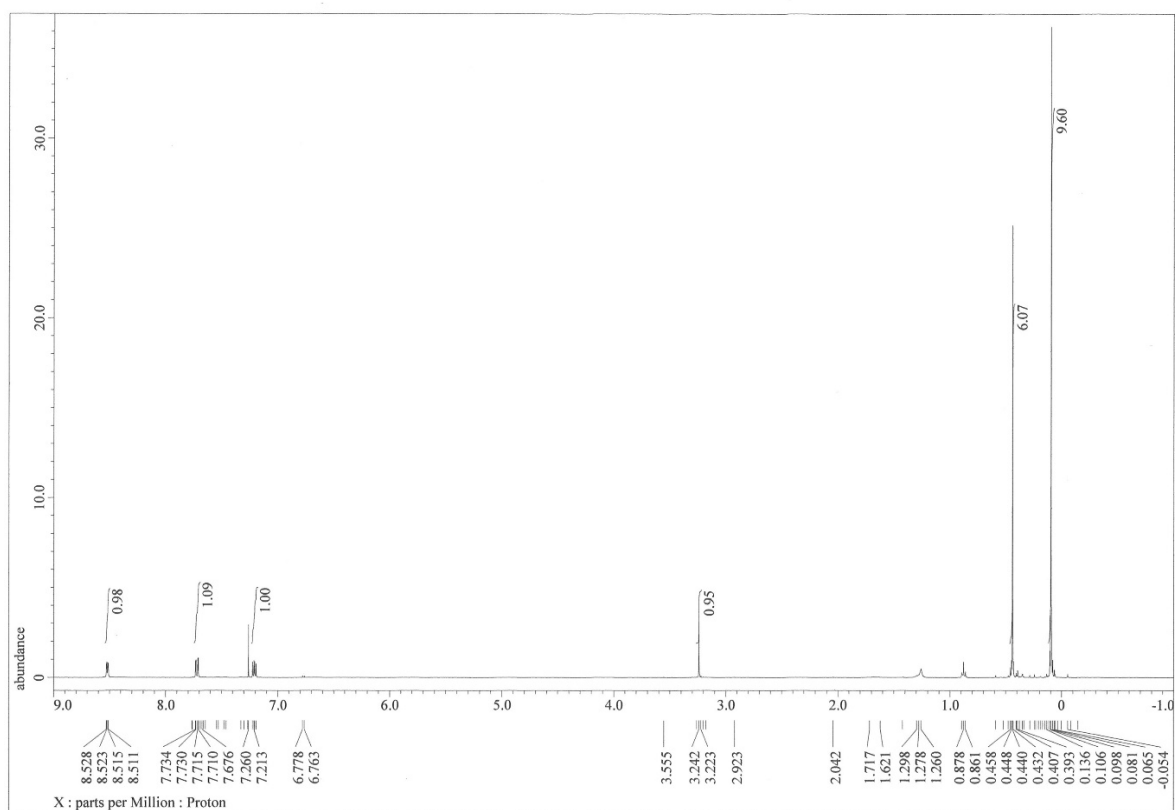

**Figure S1.**  $^1\text{H}$  NMR spectrum of **2** in  $\text{CDCl}_3$ .

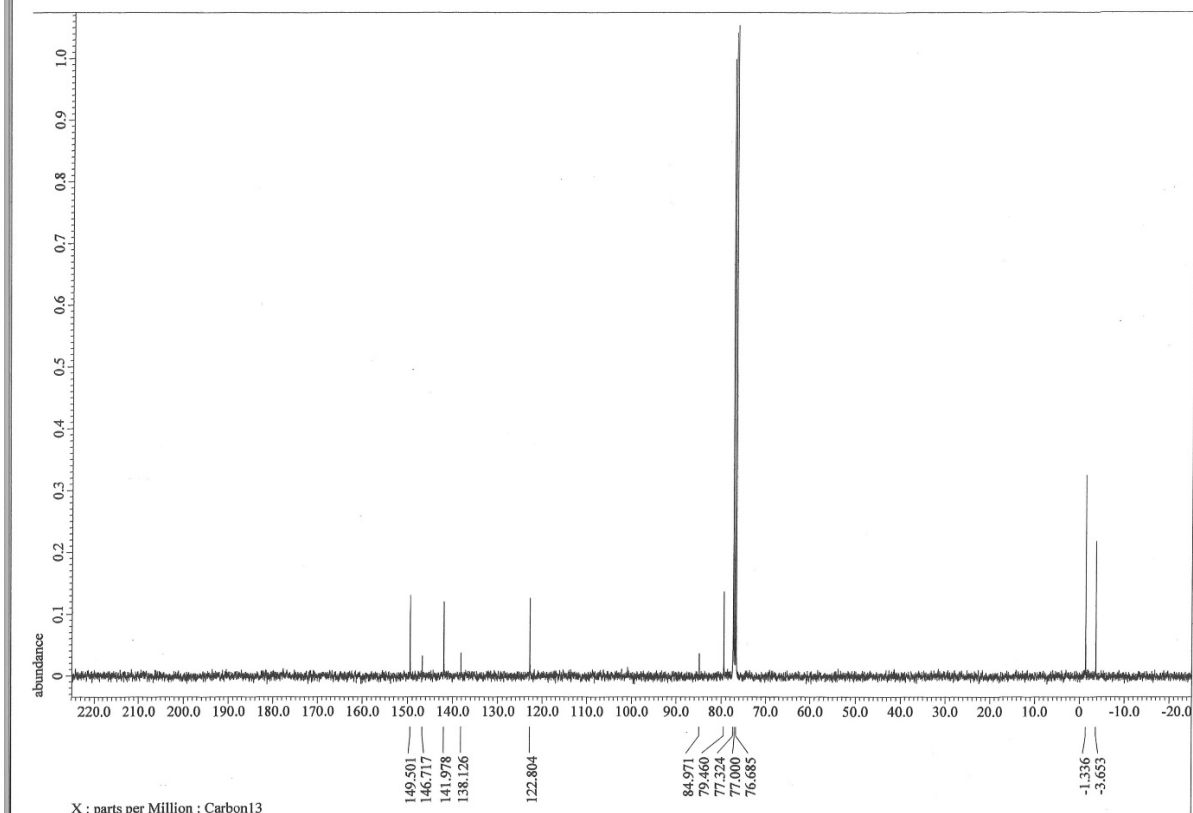

**Figure S2.**  $^{13}\text{C}$  NMR spectrum of **2** in  $\text{CDCl}_3$ .

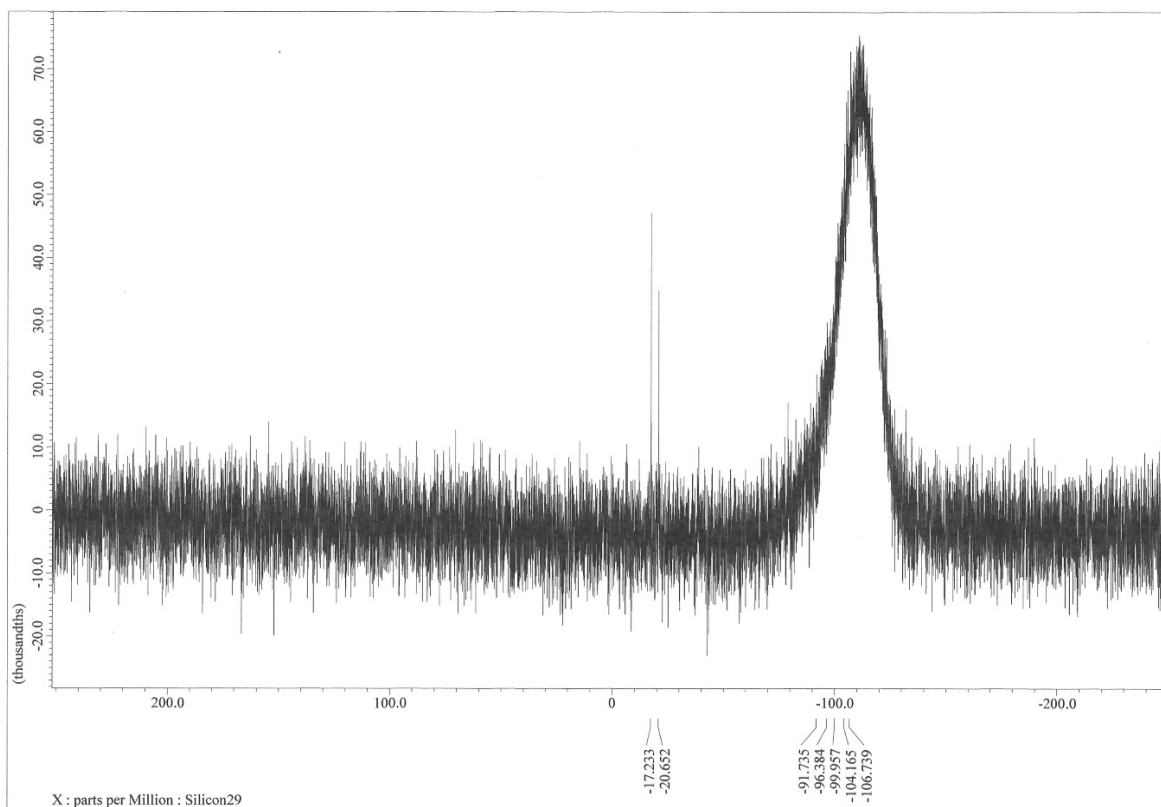

**Figure S3.**  $^{29}\text{Si}$  NMR spectrum of **2** in  $\text{CDCl}_3$ .

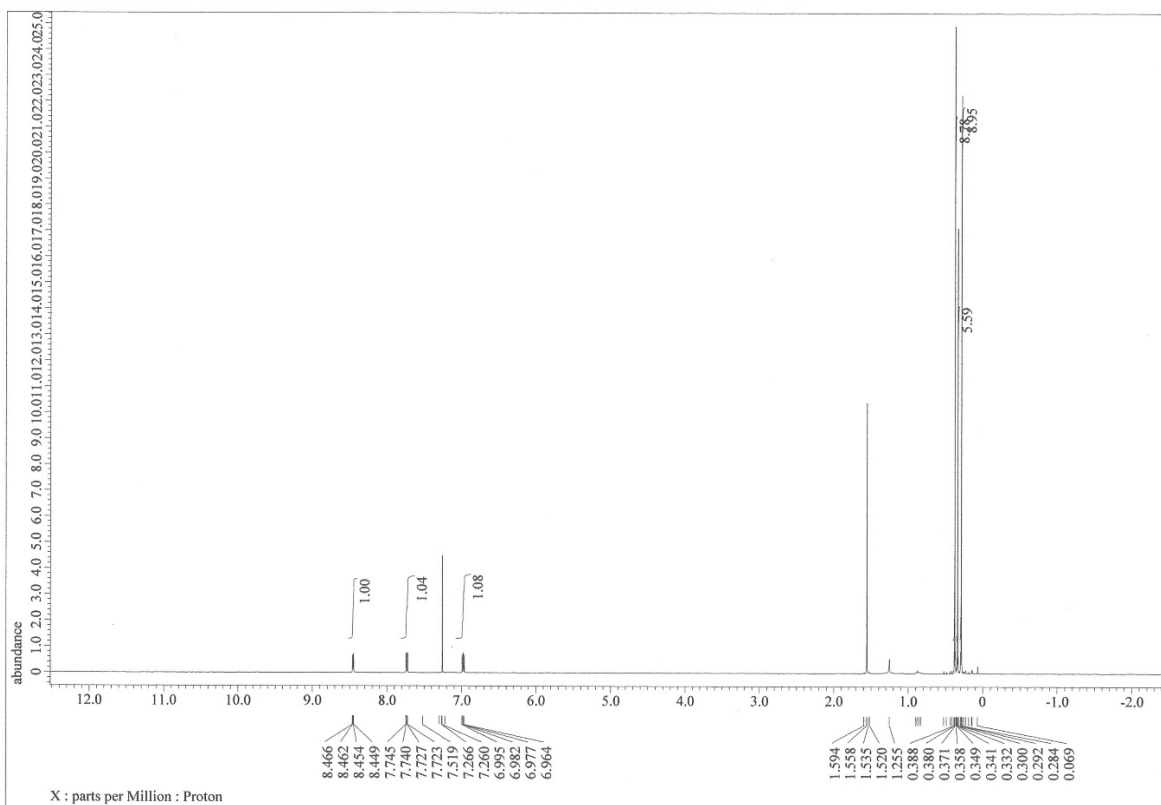

**Figure S4.**  $^1\text{H}$  NMR spectrum of **3** in  $\text{CDCl}_3$ .

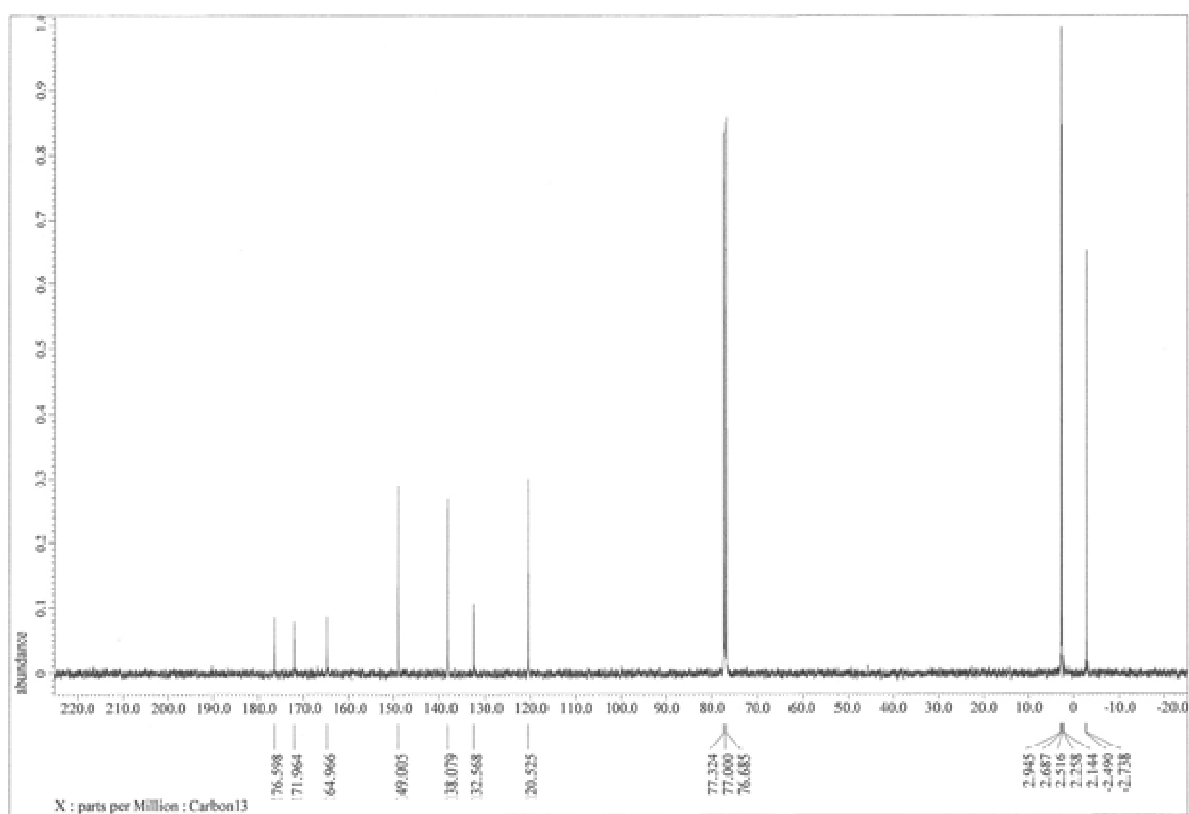

**Figure S5.** <sup>13</sup>C NMR spectrum of **3** in CDCl<sub>3</sub>.

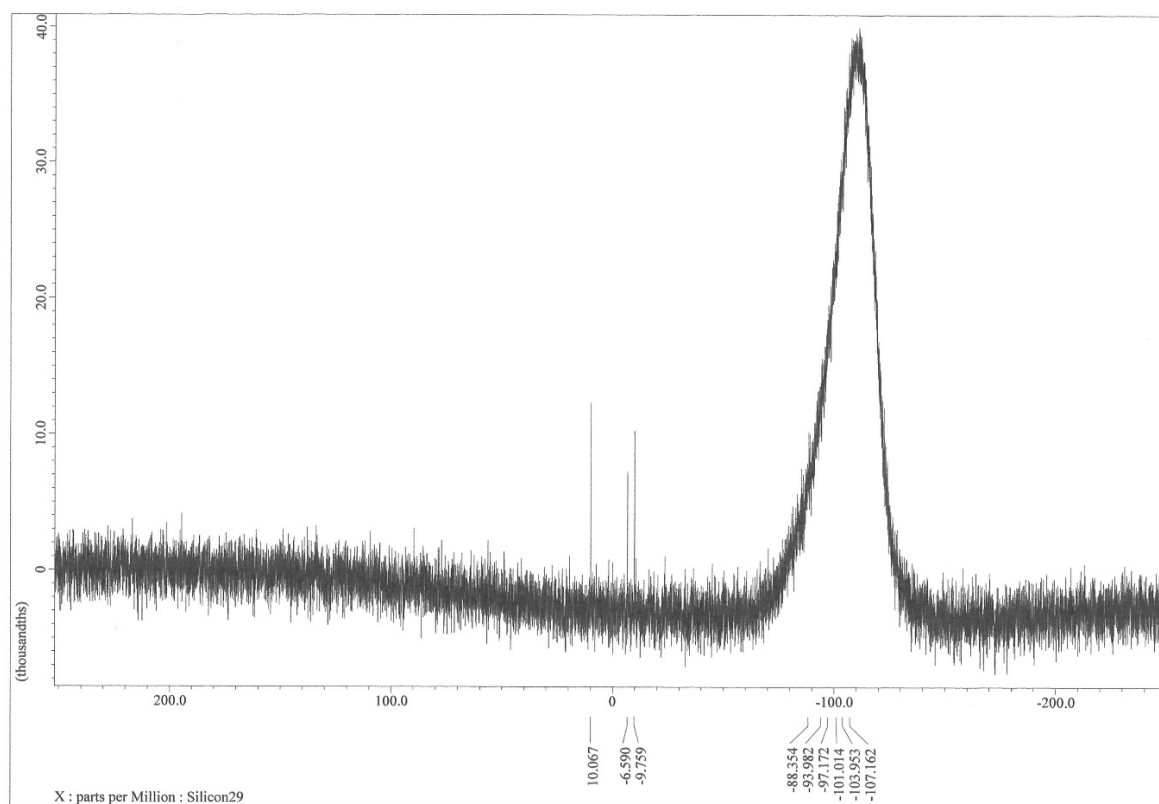

**Figure S6.** <sup>29</sup>Si NMR spectrum of **3** in CDCl<sub>3</sub>.

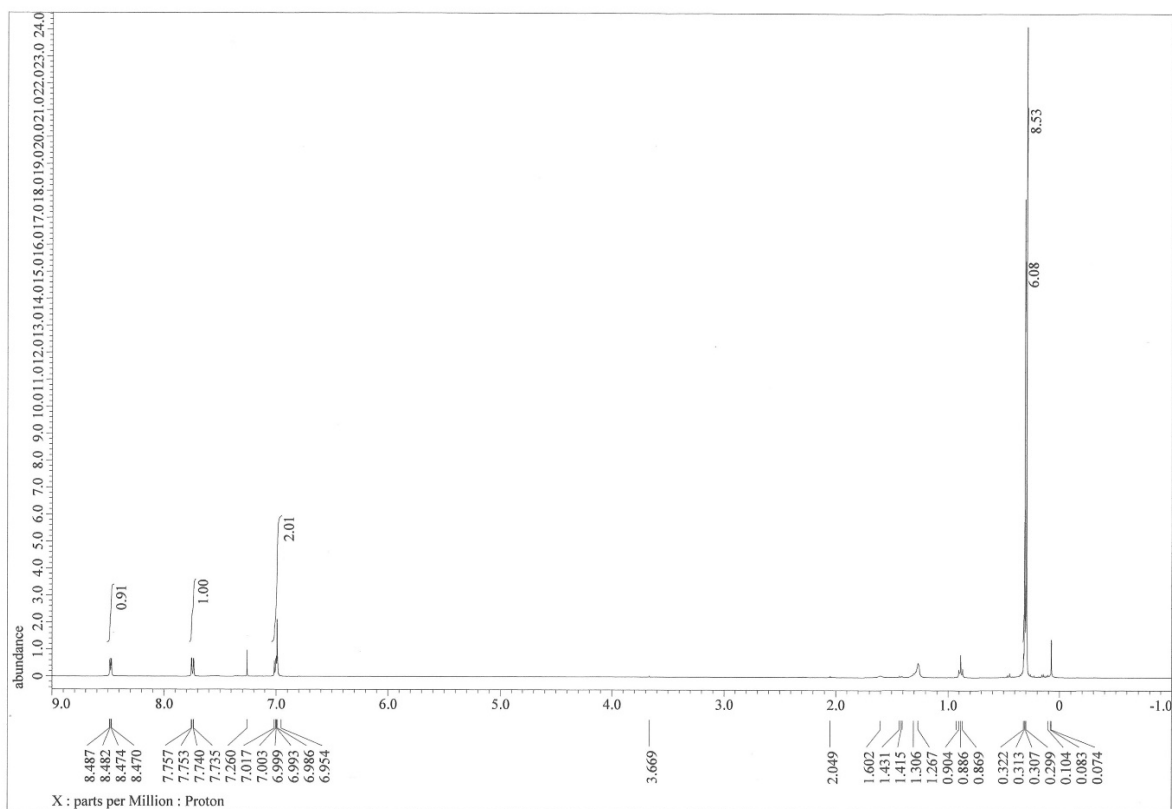

Figure S7.  $^1\text{H}$  NMR spectrum of **4** in  $\text{CDCl}_3$ .

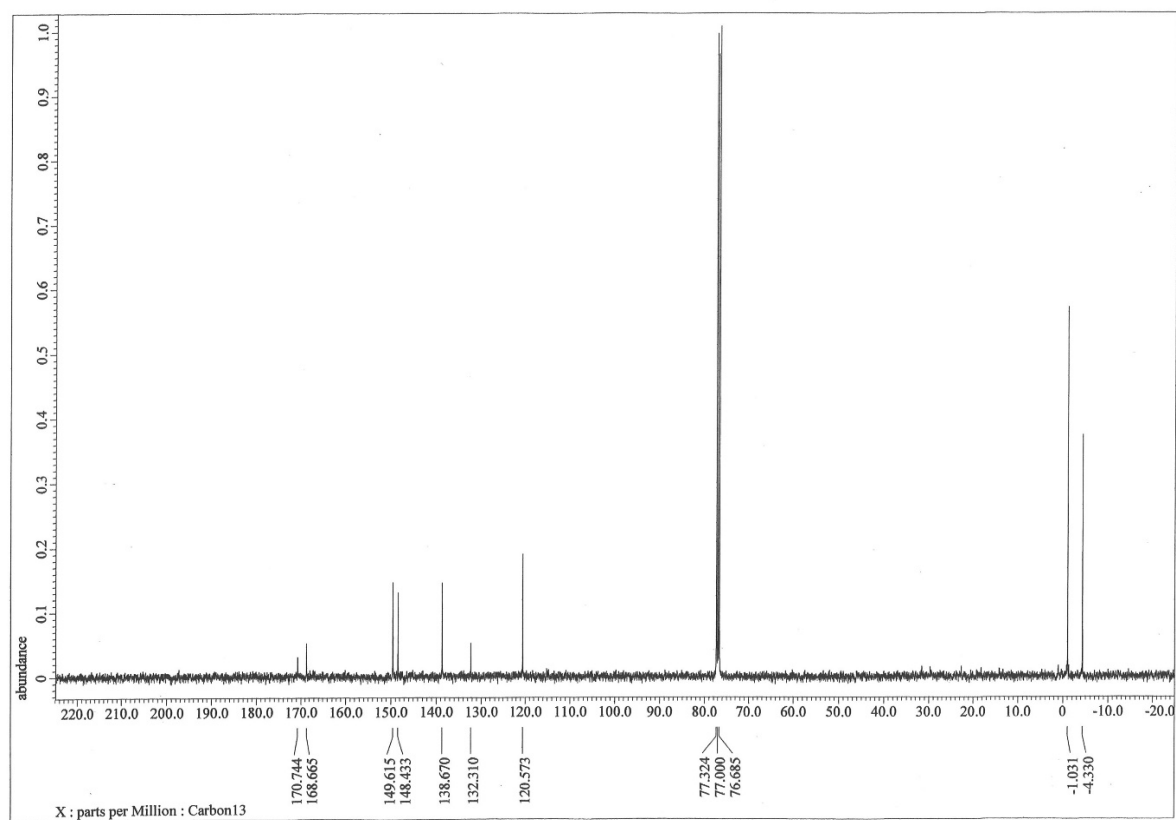

Figure S8.  $^{13}\text{C}$  NMR spectrum of **4** in  $\text{CDCl}_3$ .

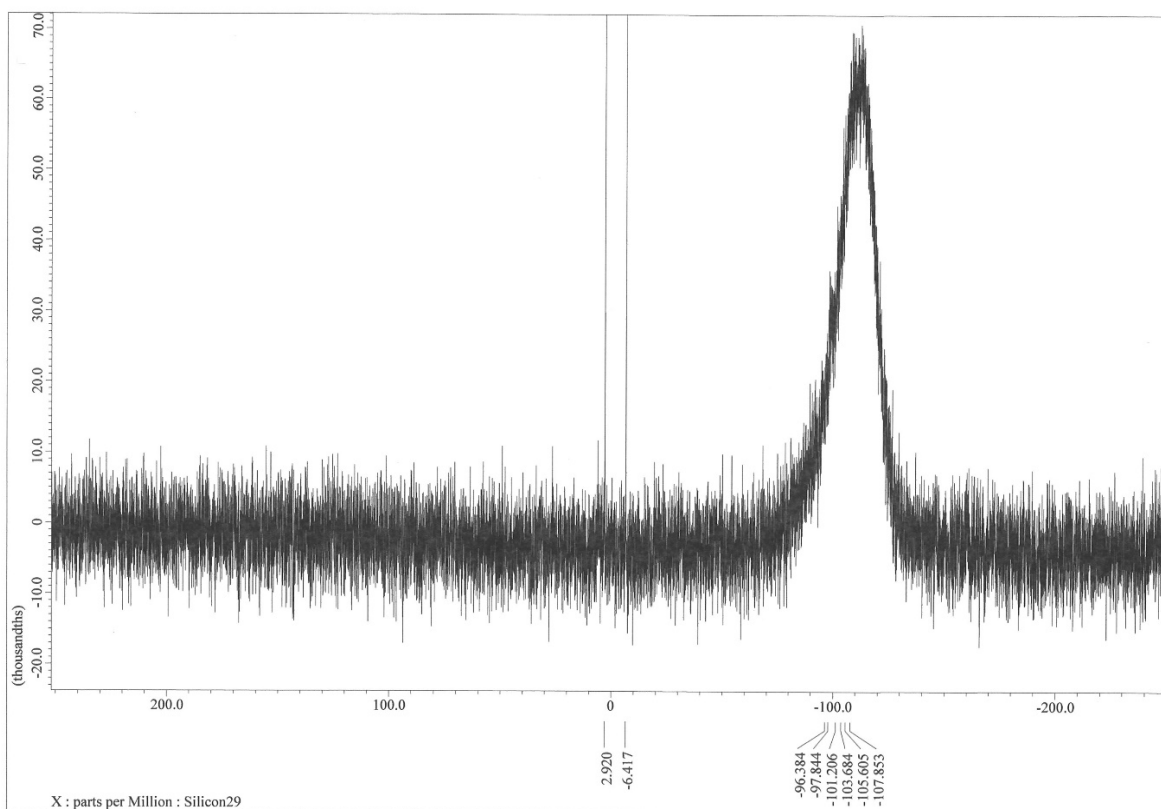

**Figure S9.**  $^{29}\text{Si}$  NMR spectrum of **4** in  $\text{CDCl}_3$ .

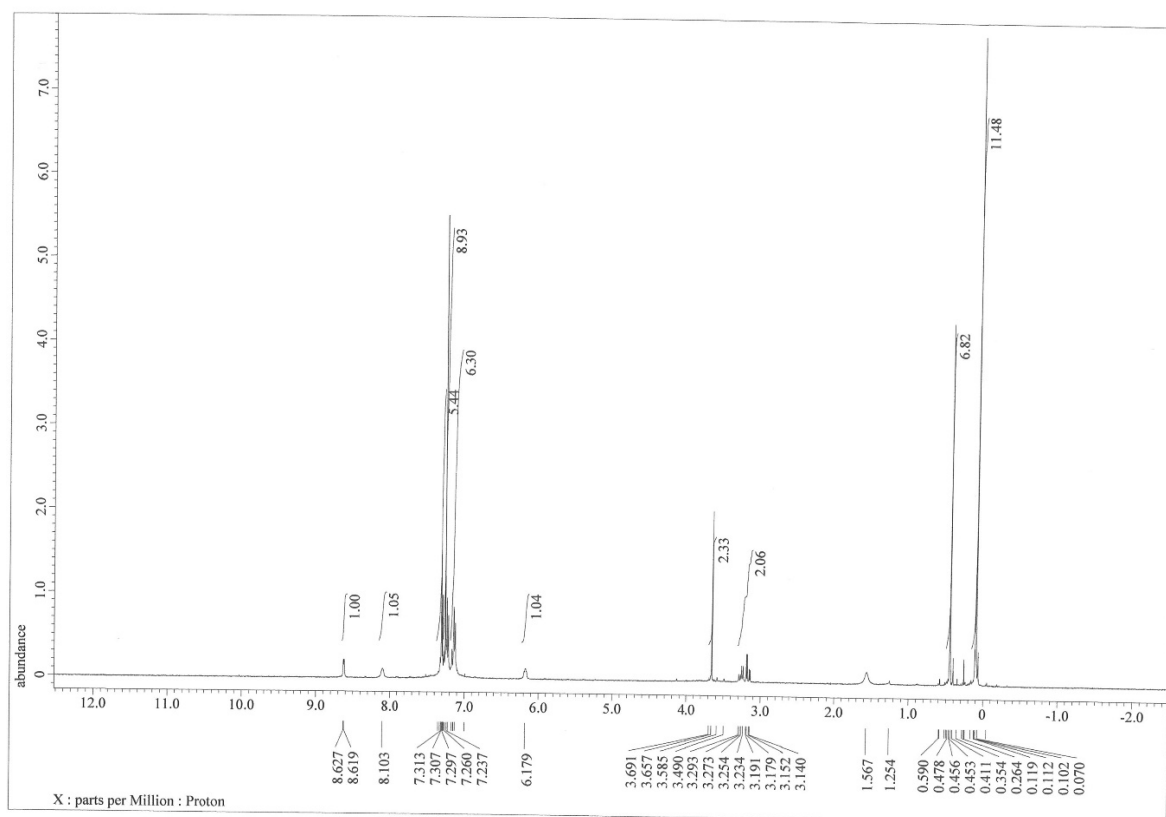

**Figure S10.**  $^1\text{H}$  NMR spectrum of **6** in  $\text{CDCl}_3$ .

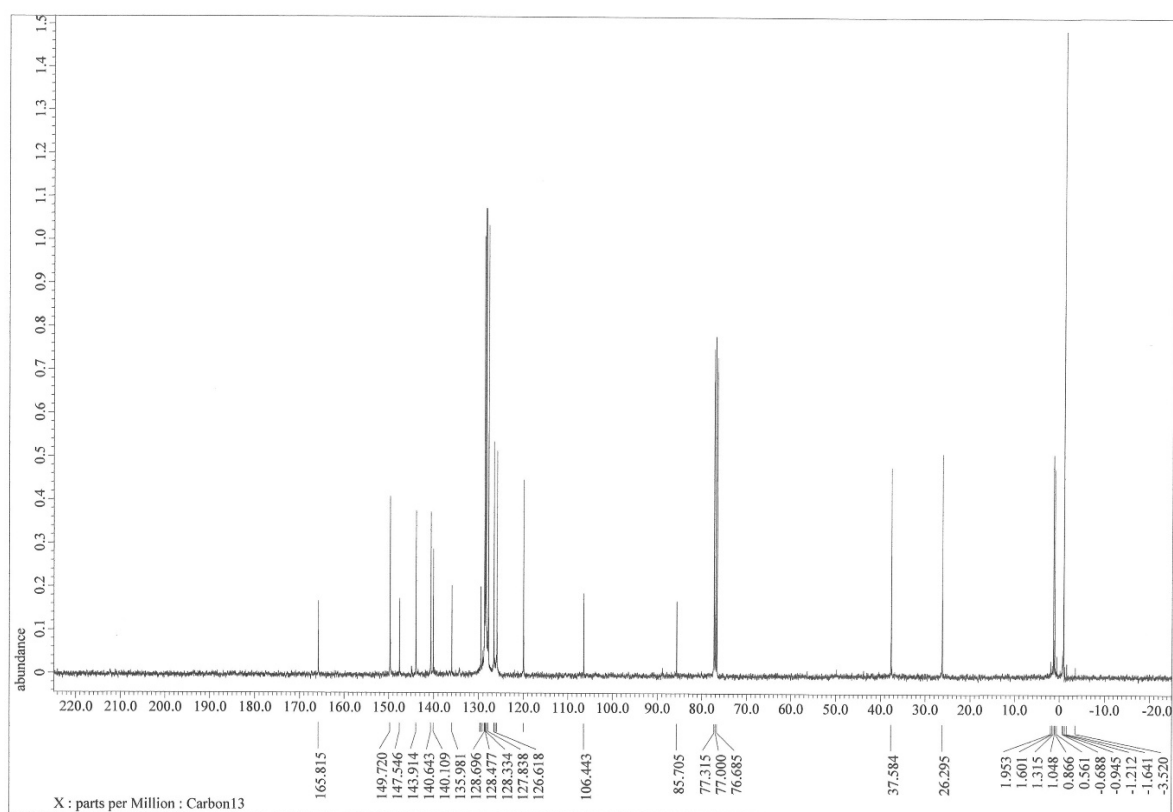

**Figure S11.** <sup>13</sup>C NMR spectrum of **6** in CDCl<sub>3</sub>.

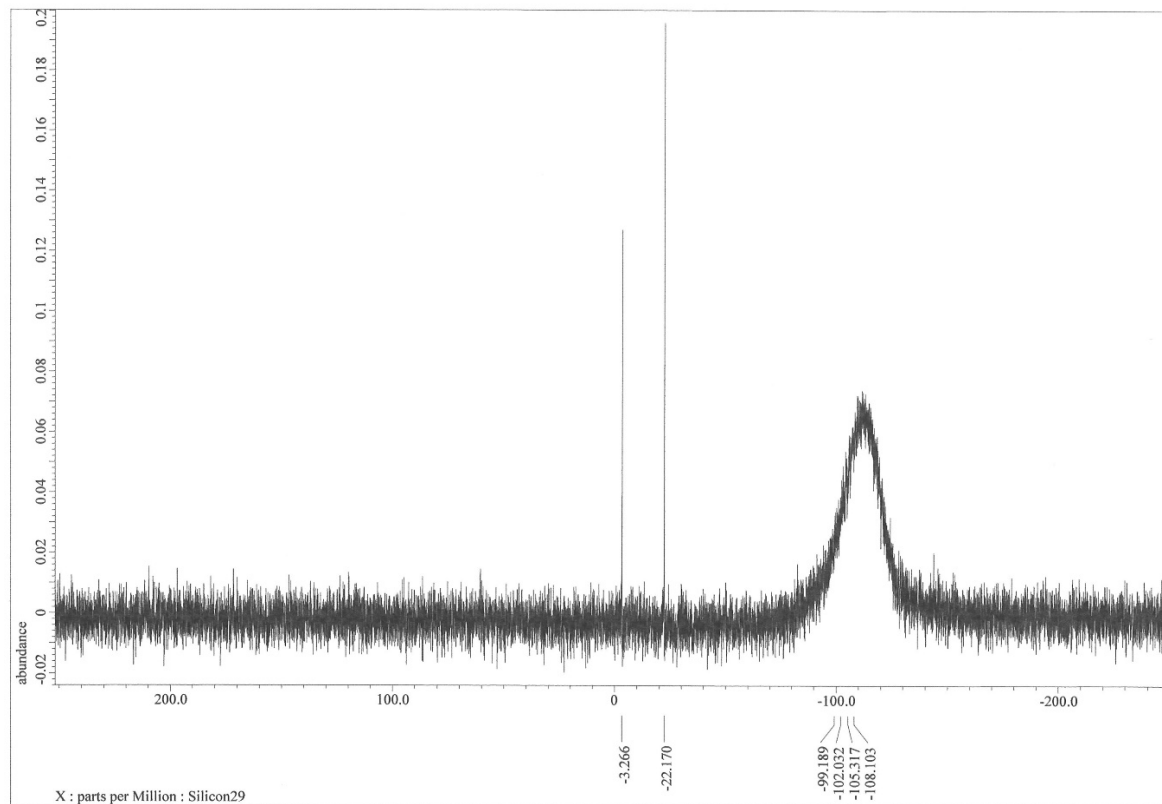

**Figure S12.** <sup>29</sup>Si NMR spectrum of **6** in CDCl<sub>3</sub>.

Optimized structures for all LM's and TS's on the trans route with RhCl(CO) model.

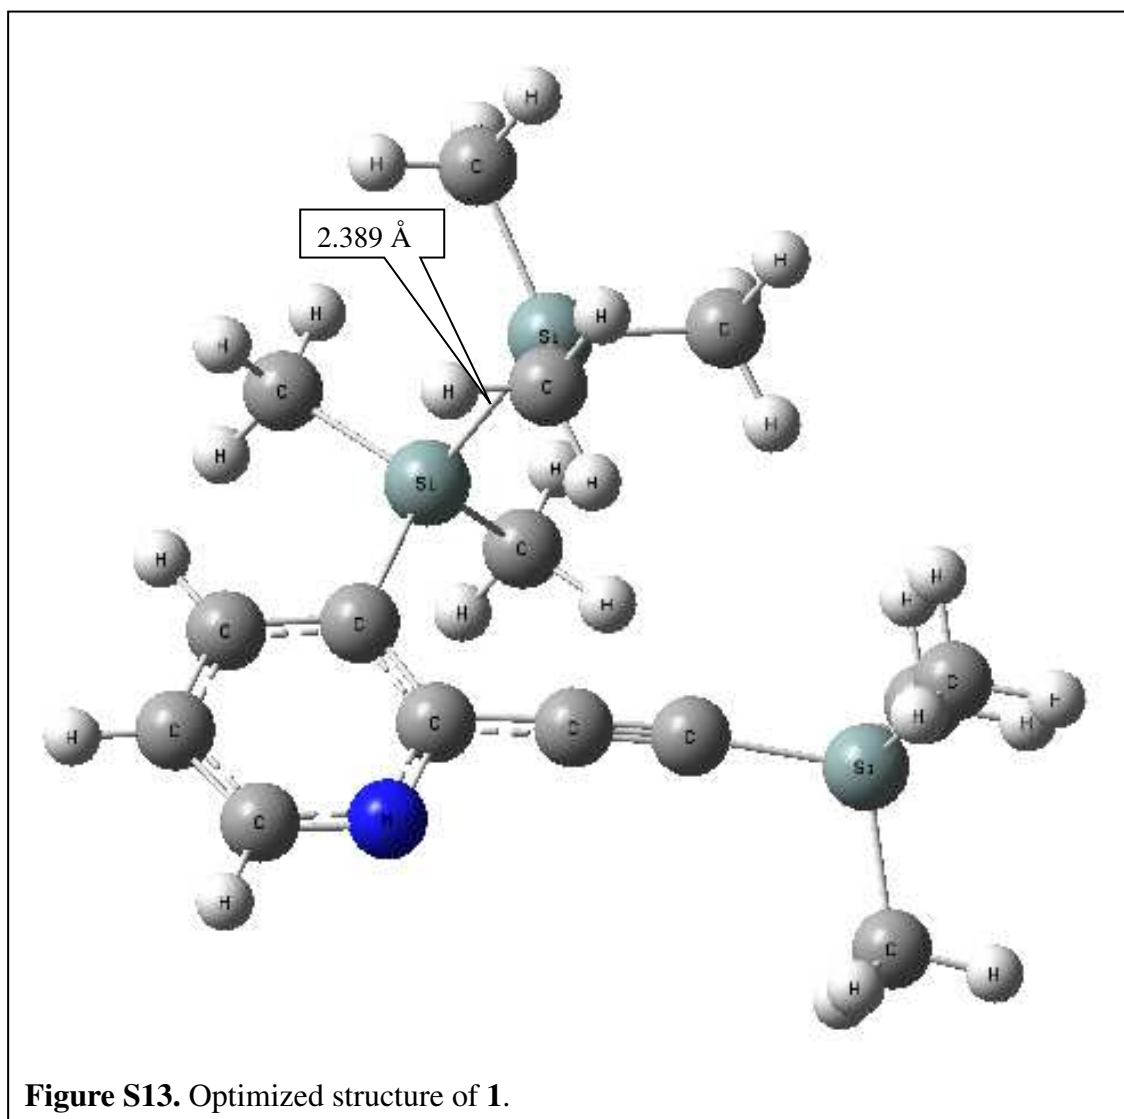

**Figure S13.** Optimized structure of **1**.

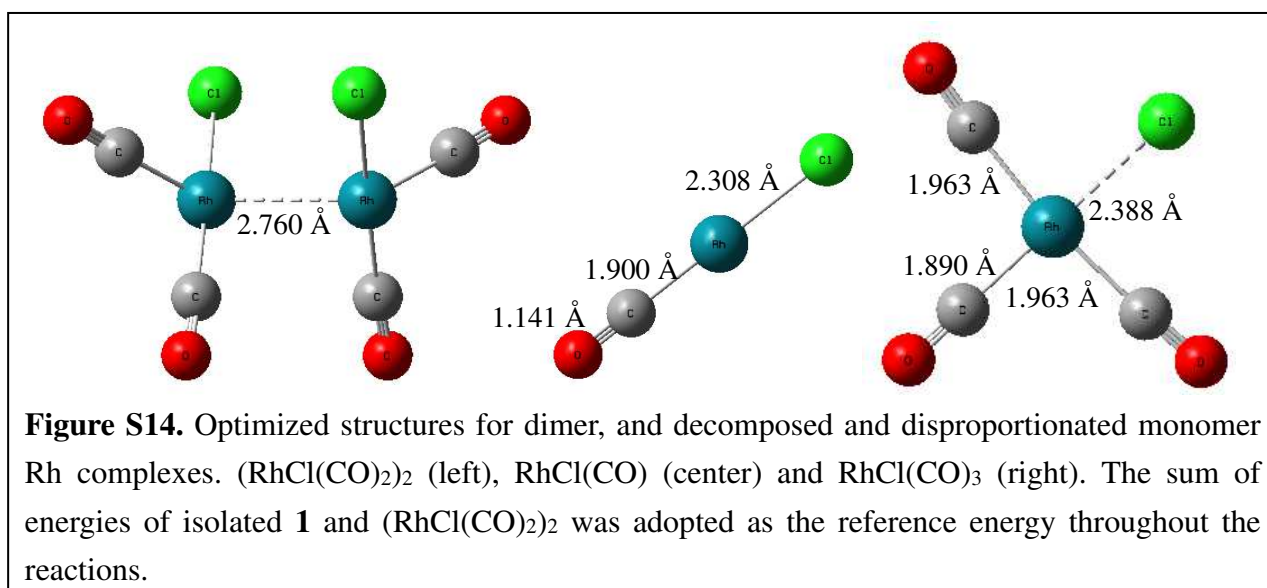



From **Figures S15** to **S21**, LM and TS structures on trans route with RhCl(CO) model are drawn.

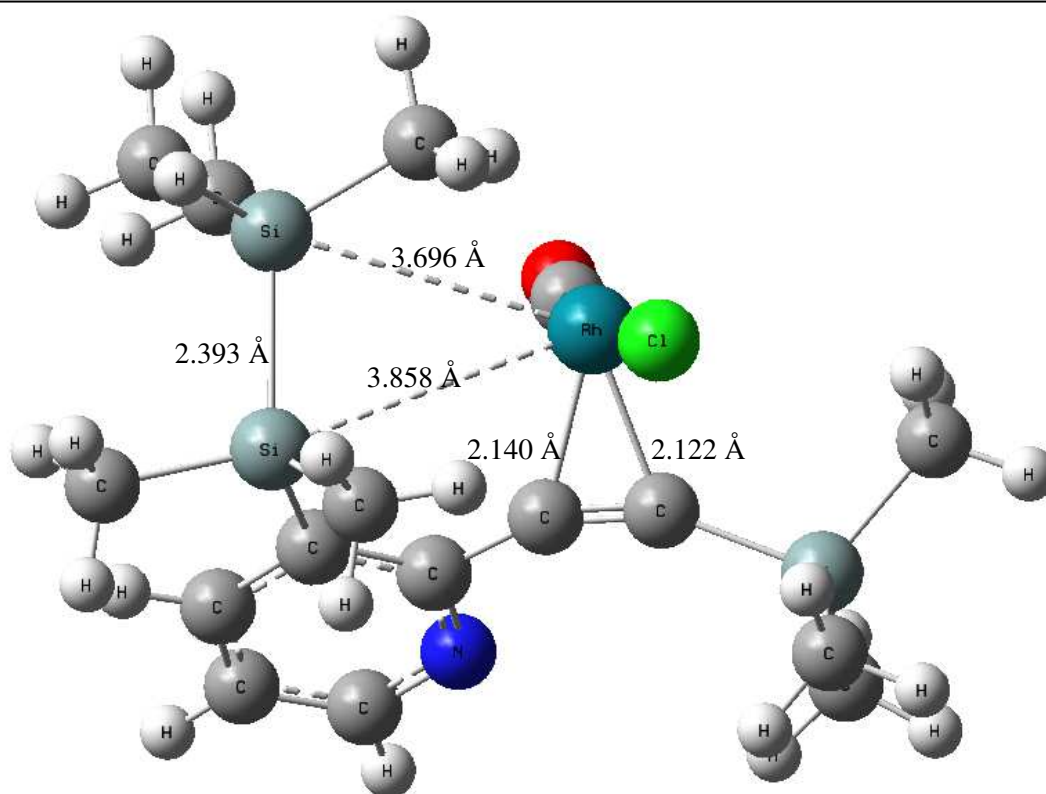

**Figure S15.** Optimized structure of **model 0(1)**. **Model 0** is a combined structure of **1** and RhCl(CO).

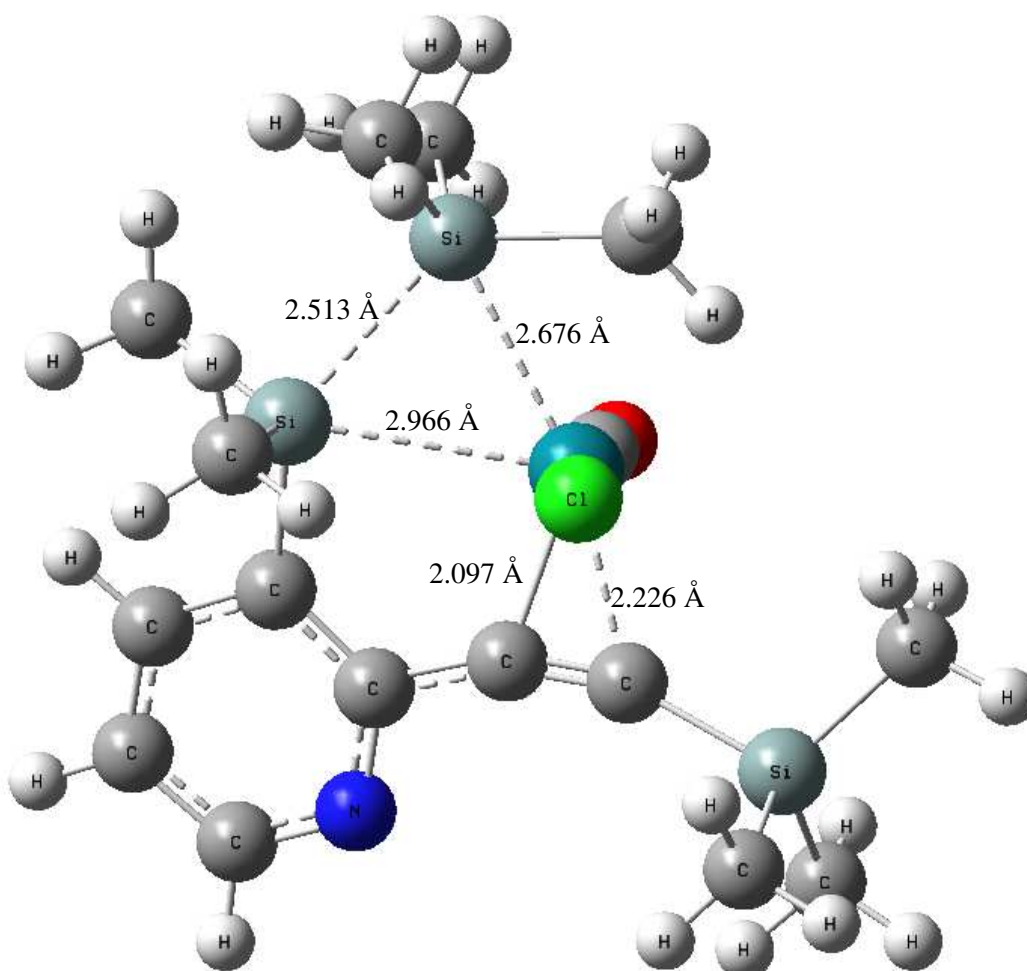

**Figure S16.** Optimized structure of TS 0-1(1). TS 0-1(1) is the TS between **model 0(1)** and **model 1(1)** with RhCl(CO) model.

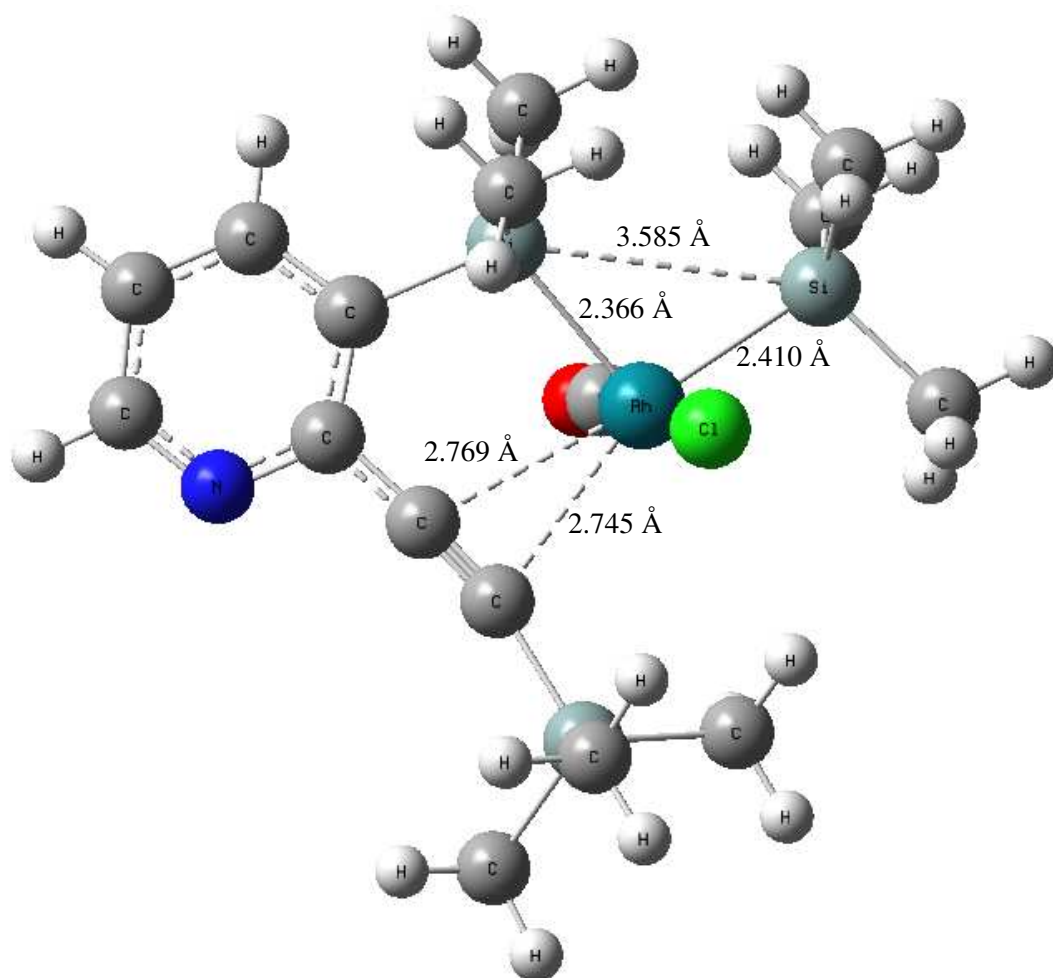

**Figure S17.** Optimized structure of **model 1(1)** with RhCl(CO) model.

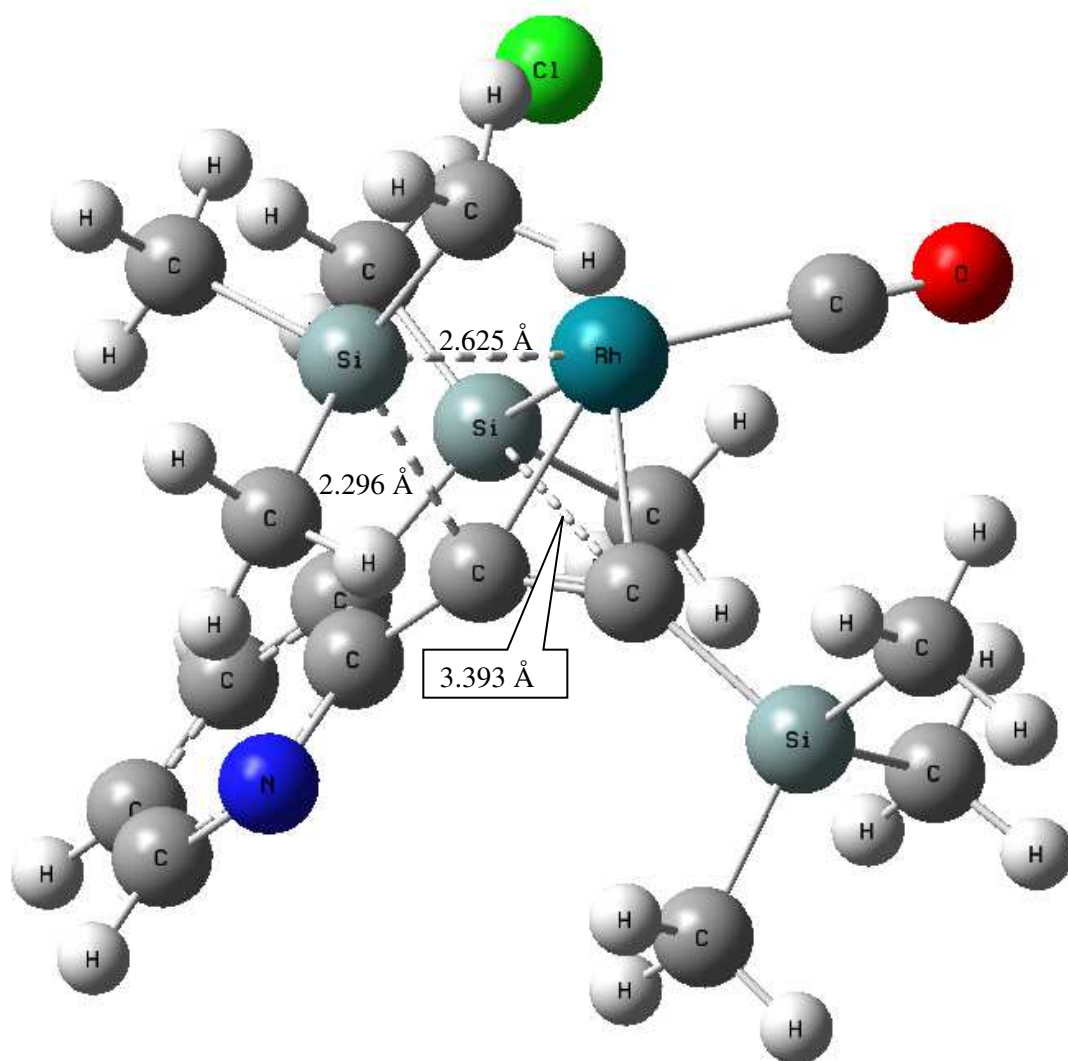

**Figure S18.** Optimized structure of **TS 1-2(1)** with RhCl(CO) model. **TS 1-2(1)** is the TS between **model 1(1)** and **model 2(1)**.

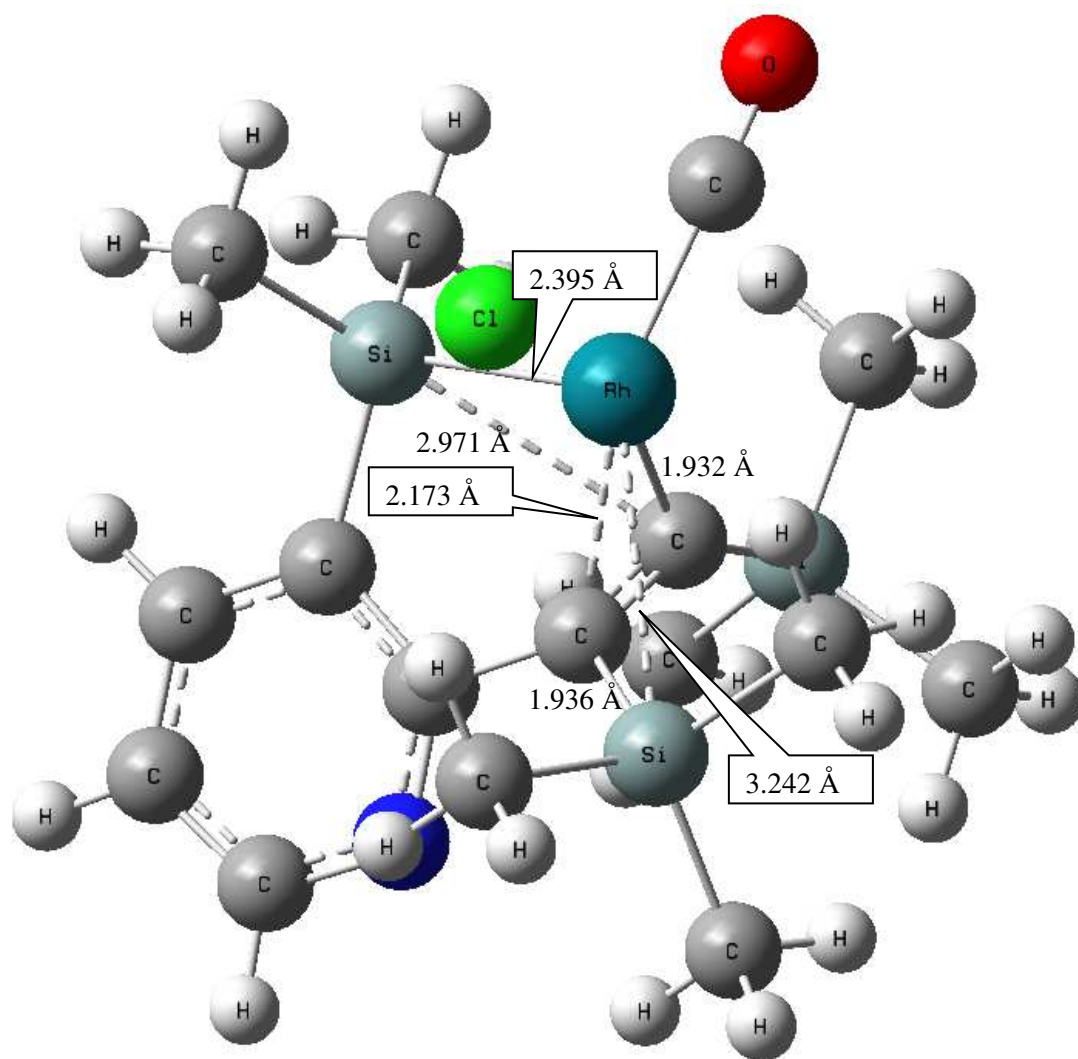

**Figure S19.** Optimized structure of **model 2(1)** with RhCl(CO) model.

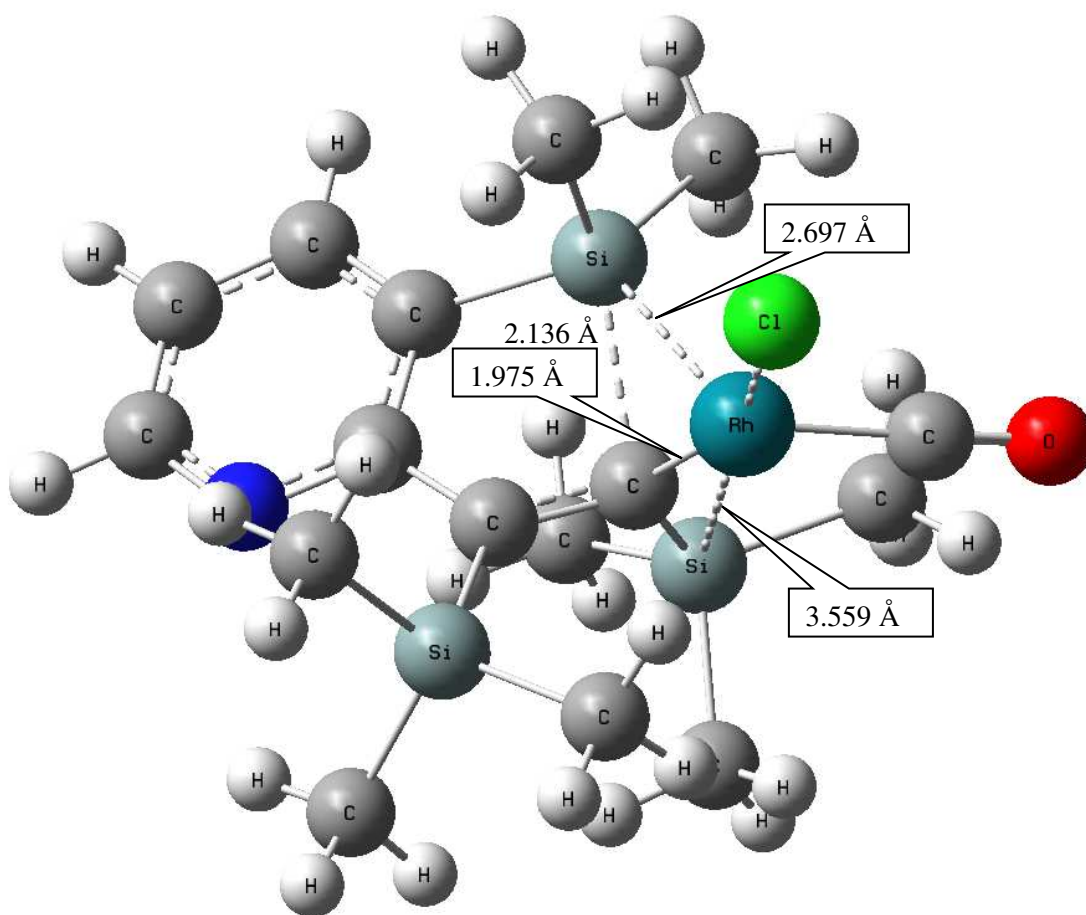

**Figure S20.** Optimized structure of **TS 2-3(1)** with RhCl(CO) model. **TS 2-3(1)** is the TS between **model 2(1)** and **model 3(1)**.

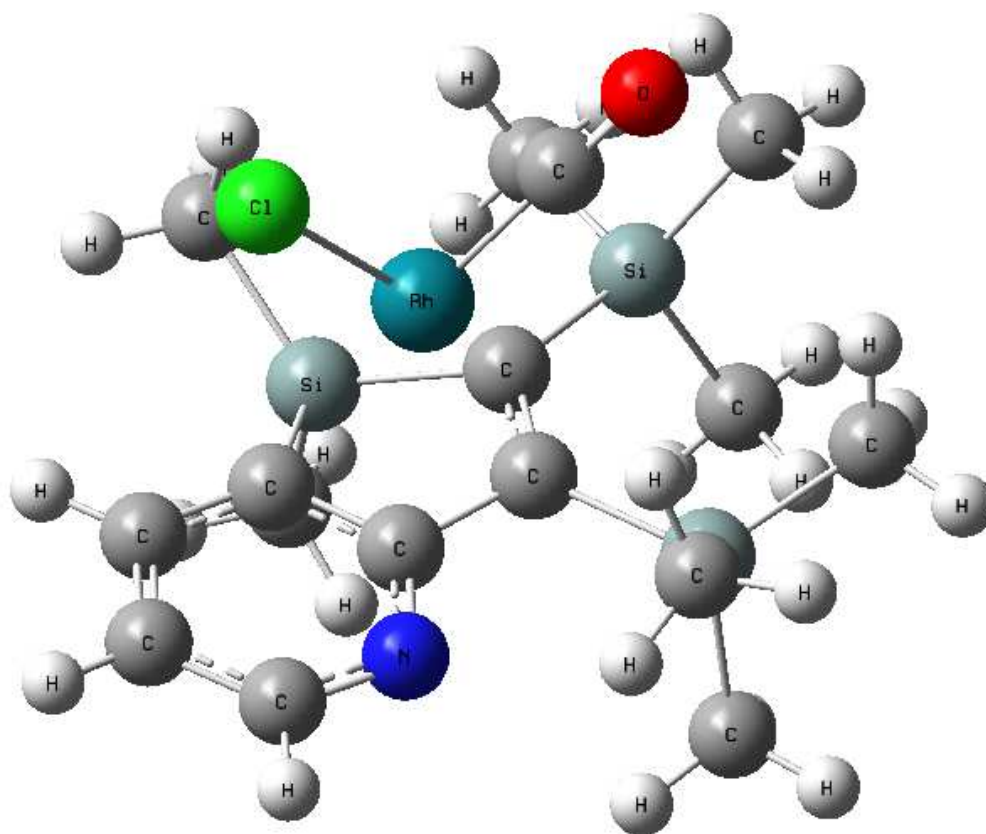

**Figure S21.** Optimized structure of **model 3(1)** corresponding to combined structure of compound **3** and RhCl(CO).

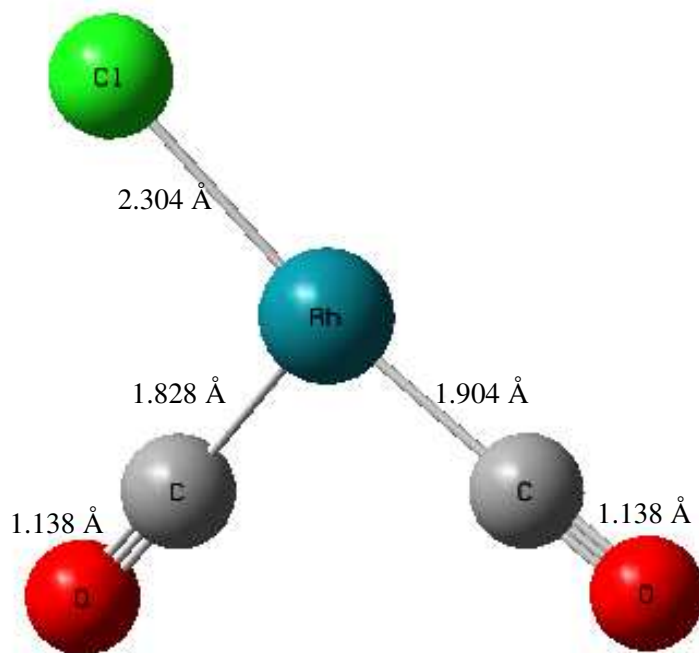

**Figure S22.** Optimized structure of RhCl(CO)<sub>2</sub>.

From **Figures S23** to **S29**, LM and TS structures on trans route with  $\text{RhCl}(\text{CO})_2$  model are drawn. For clarity of figures, H atoms are omitted in the drawing.

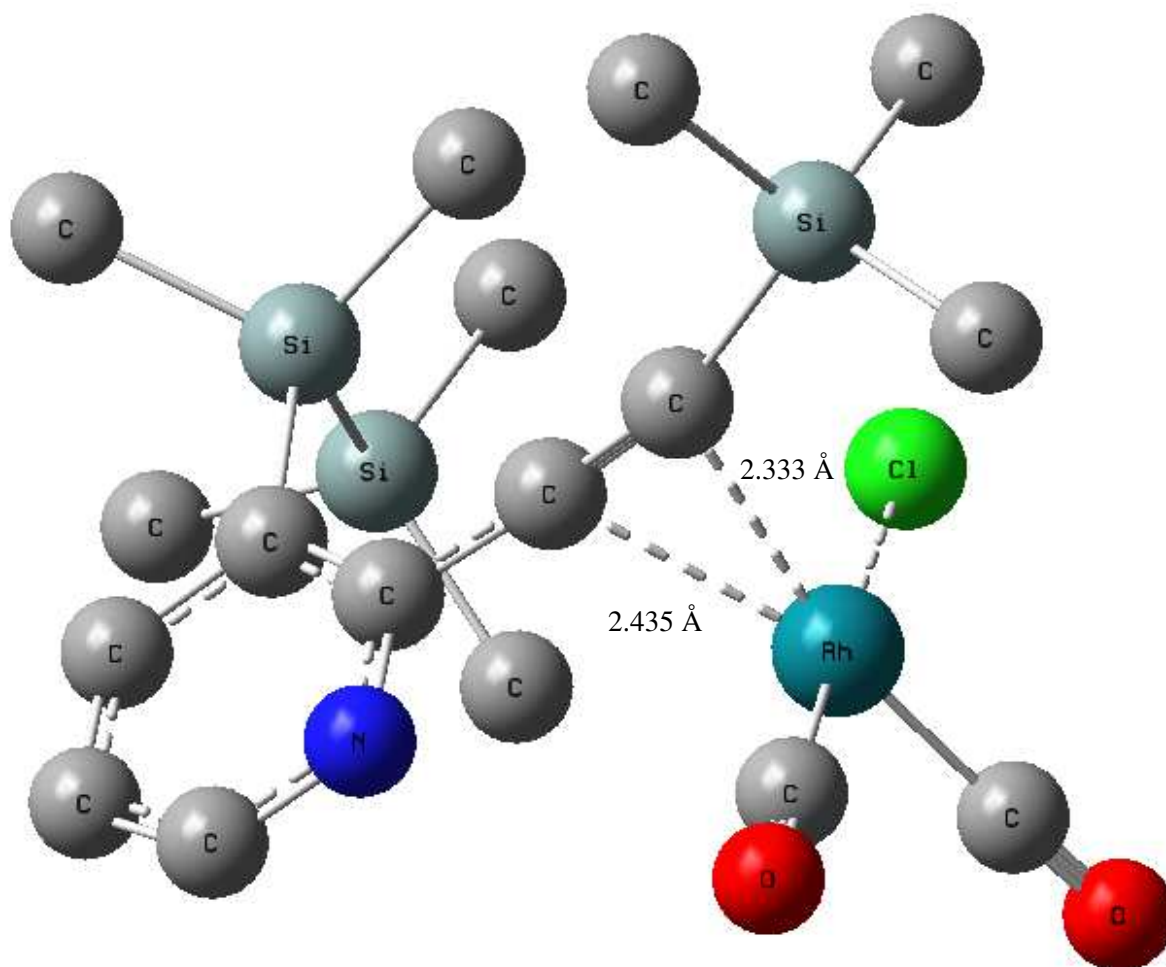

**Figure S23.** Optimized structure of **model 0(2)**. **Model 0(2)** is a combined structure of **1** and  $\text{RhCl}(\text{CO})_2$ .



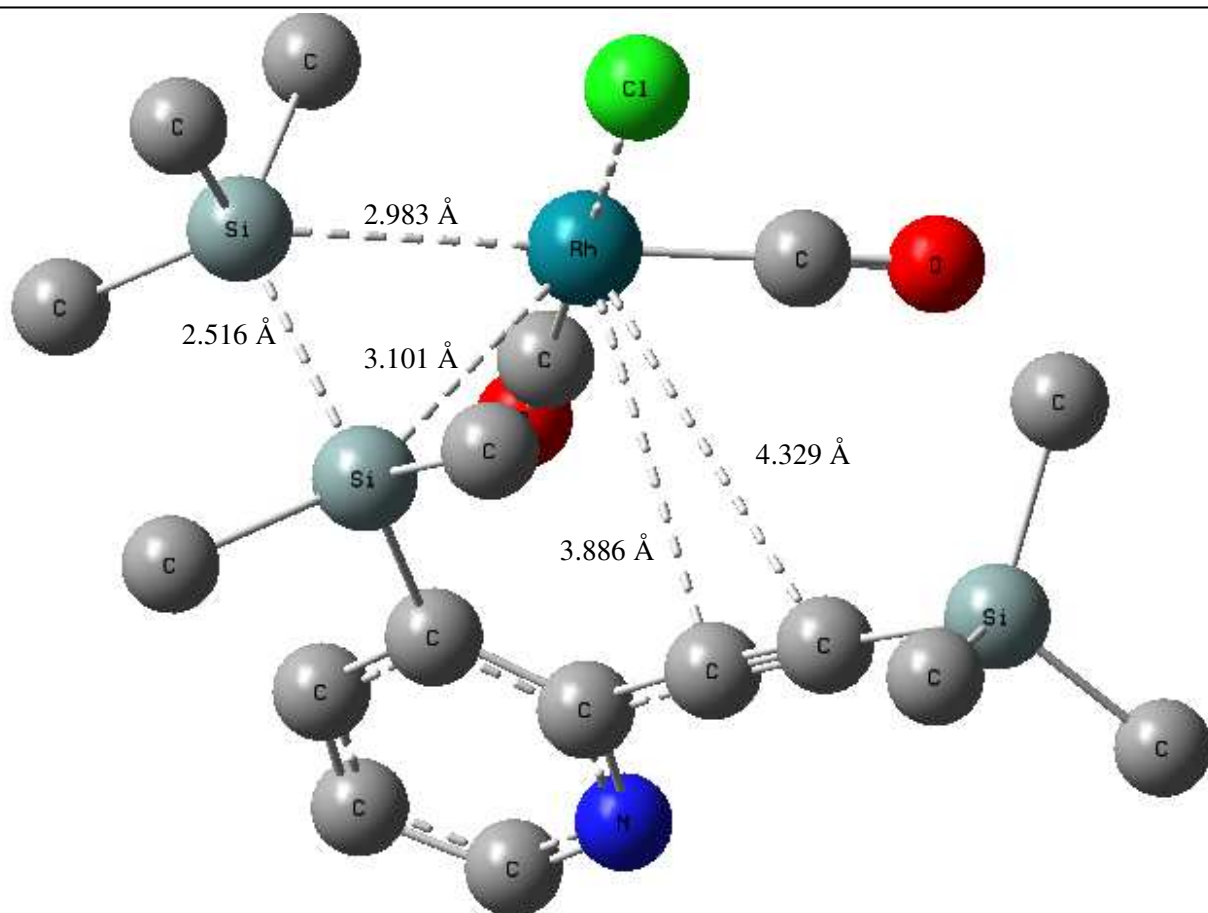

**Figure S24.** Optimized structure of TS 0-1(2). TS 0-1(2) is the TS between **model 0(2)** and **model 1(2)** with RhCl(CO)<sub>2</sub> model.

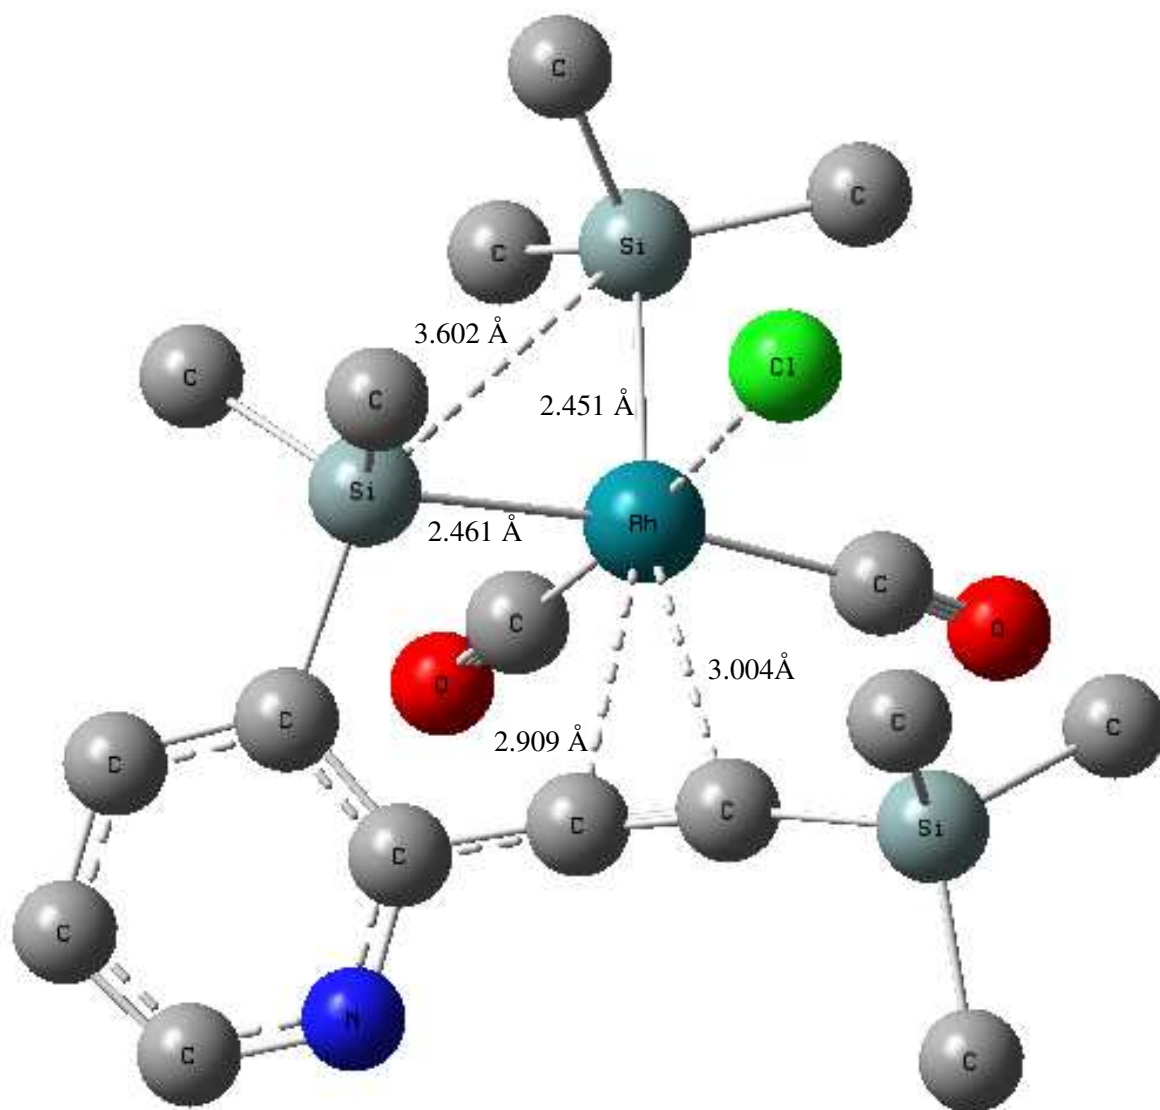

**Figure S25.** Optimized structure of **model 1(2)** with RhCl(CO)<sub>2</sub> model.

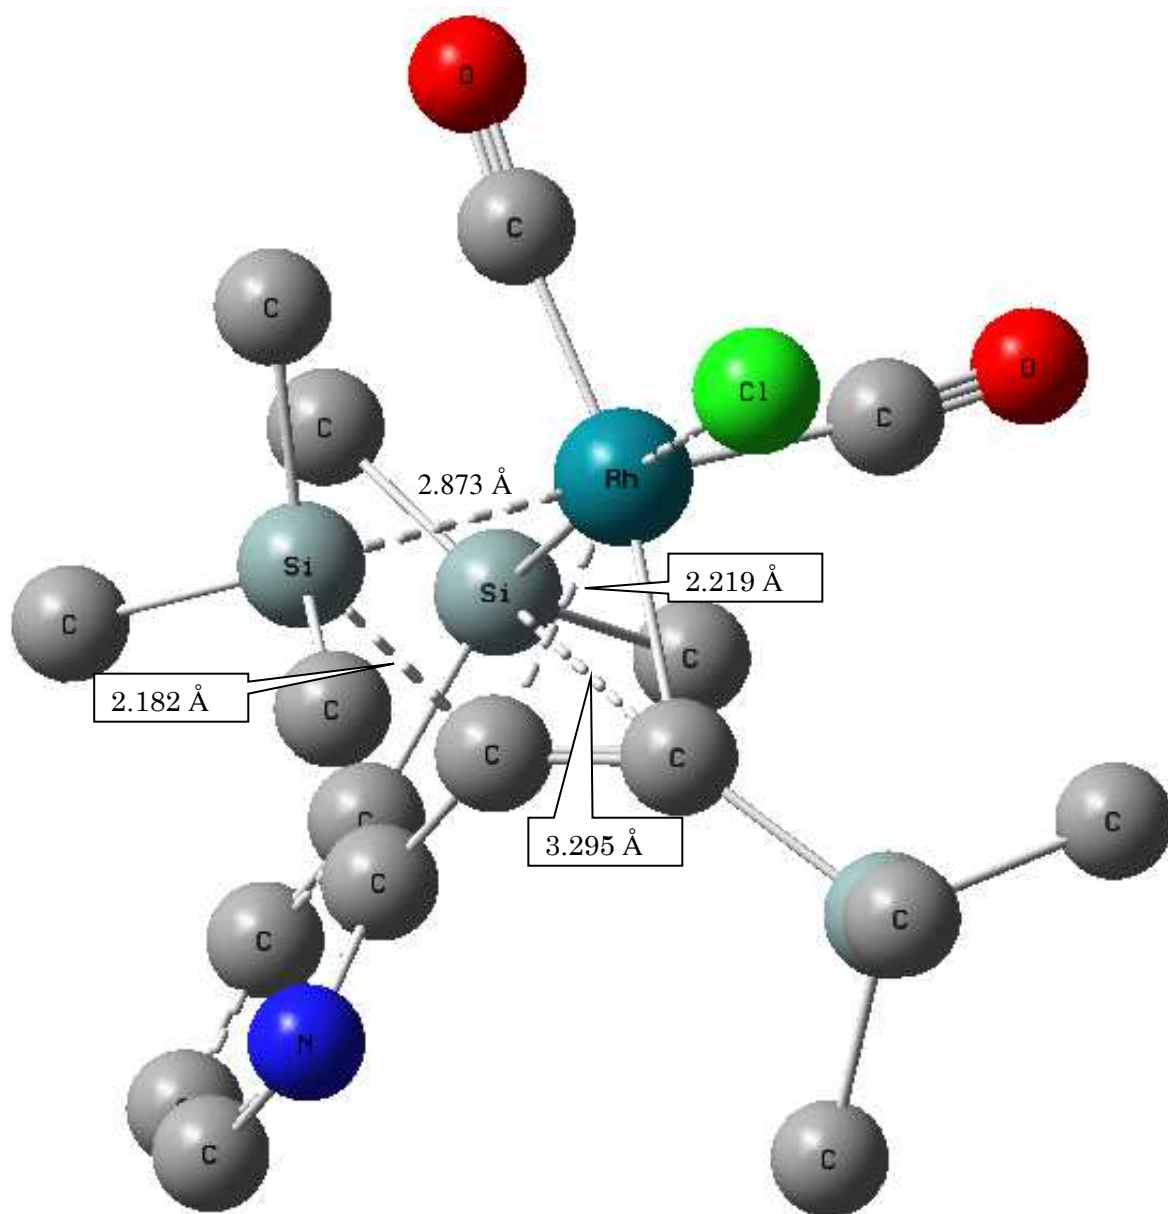

**Figure S26.** Optimized structure of **TS 1-2(2)**. **TS 1-2(2)** is the TS between **model 1(2)** and **model 2(2)** with RhCl(CO)<sub>2</sub> model.

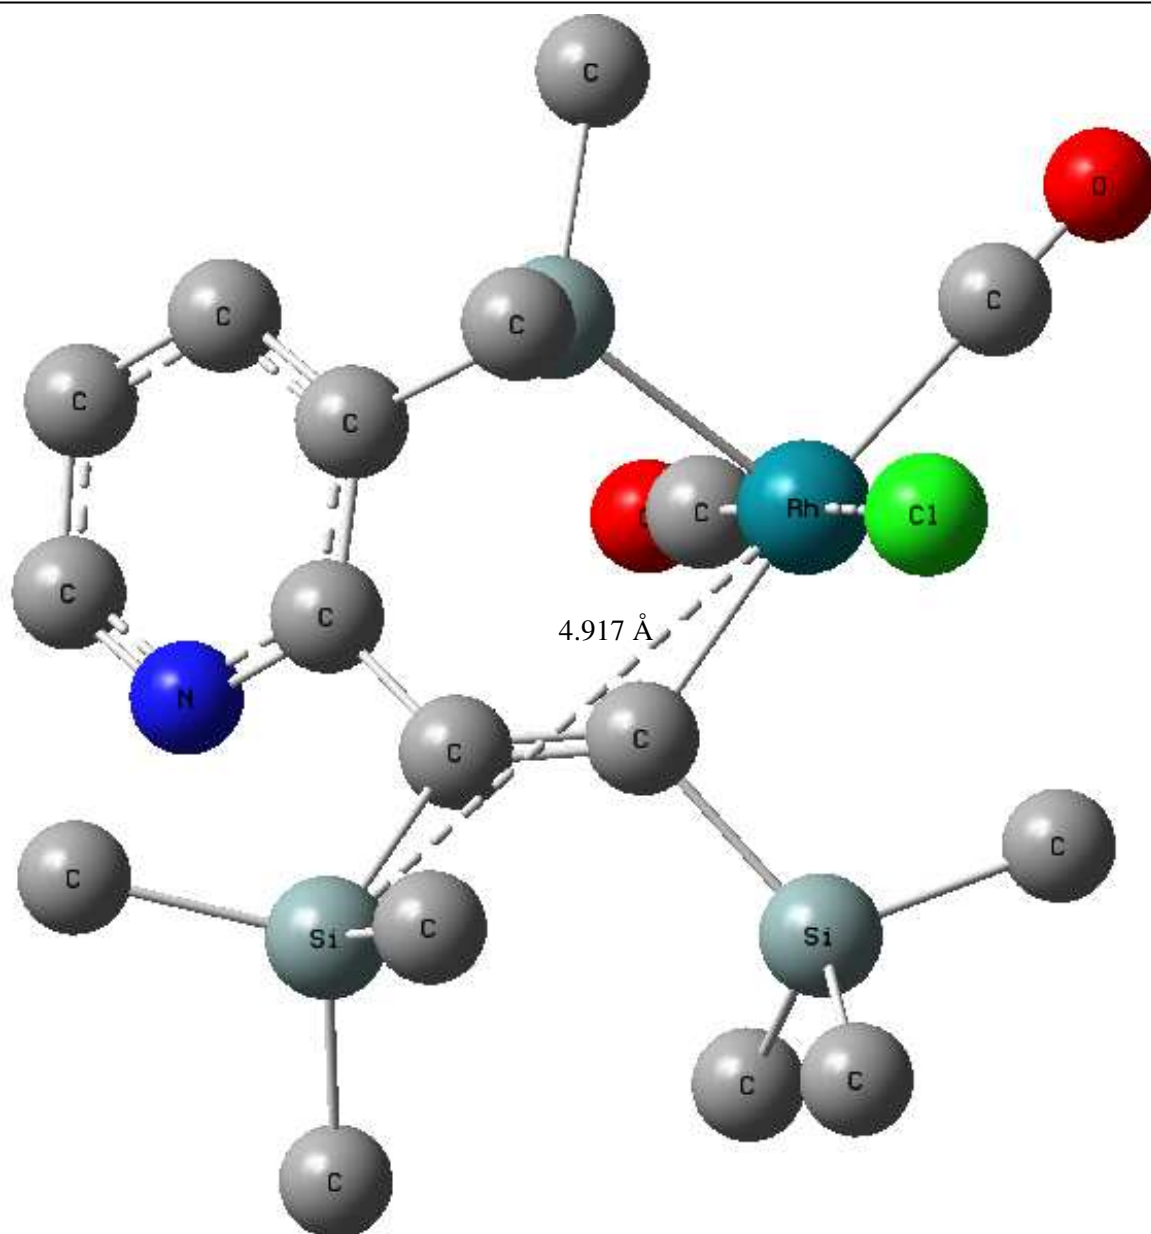

**Figure S27.** Optimized structure of **model 2(2)** with RhCl(CO)<sub>2</sub> model.

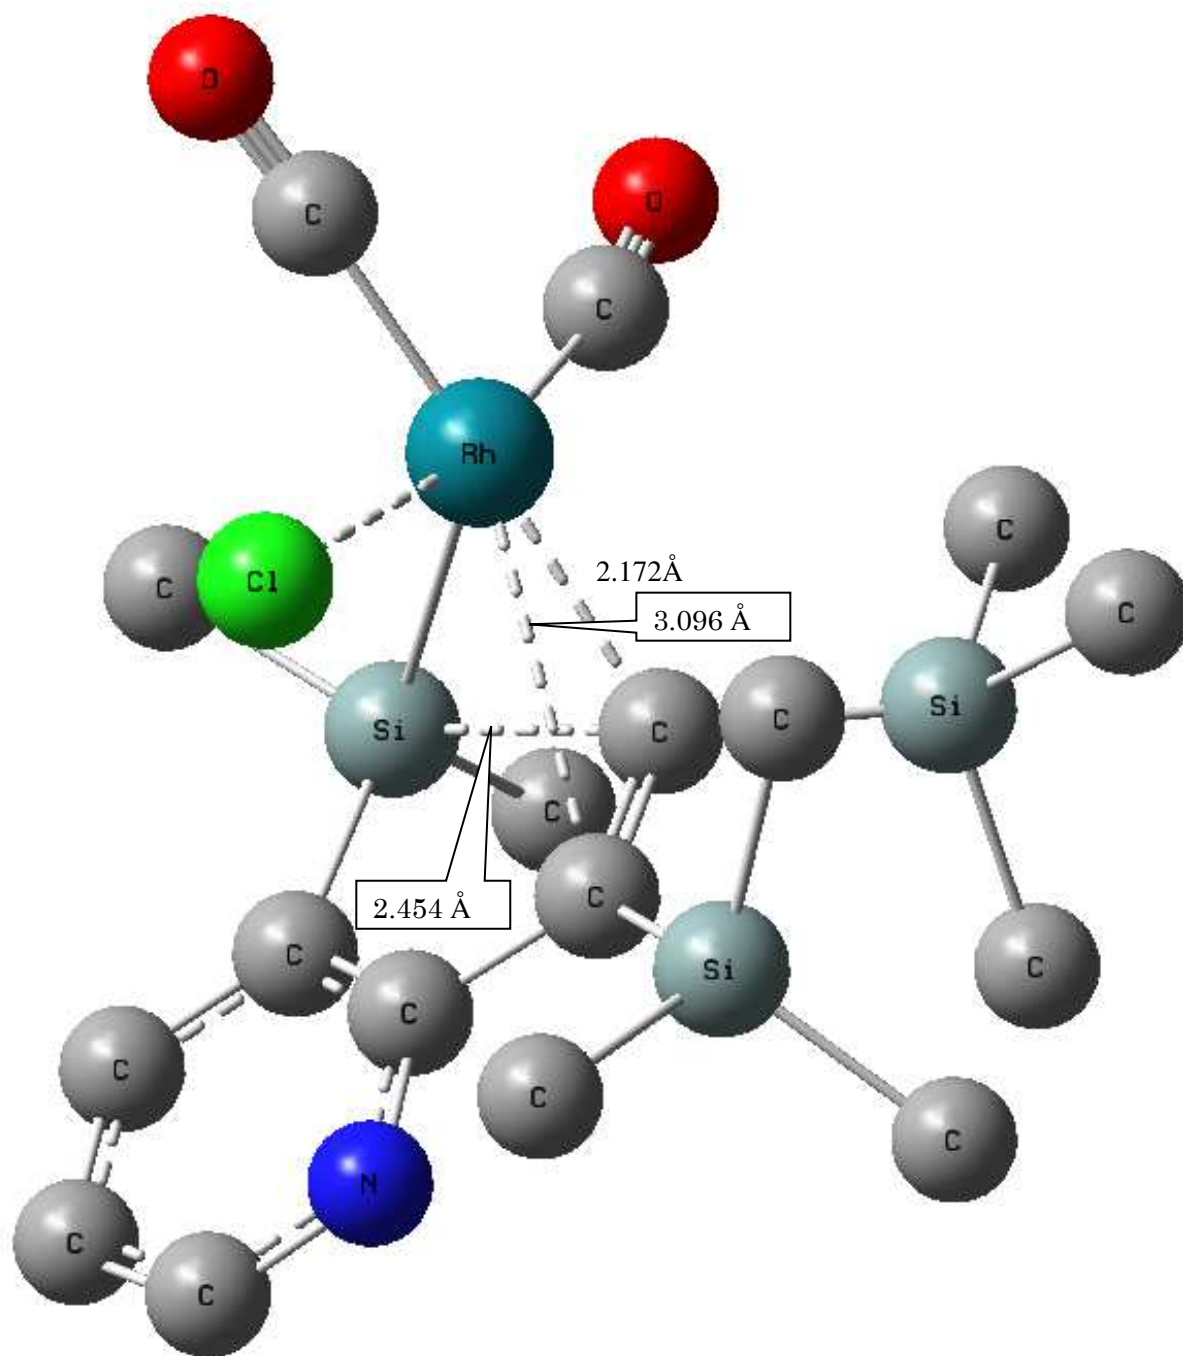

**Figure S28.** Optimized structure of **TS 2-3(2)**. **TS 2-3(2)** is the TS between **model 2(2)** and **model 3(2)** with  $\text{RhCl}(\text{CO})_2$  model.

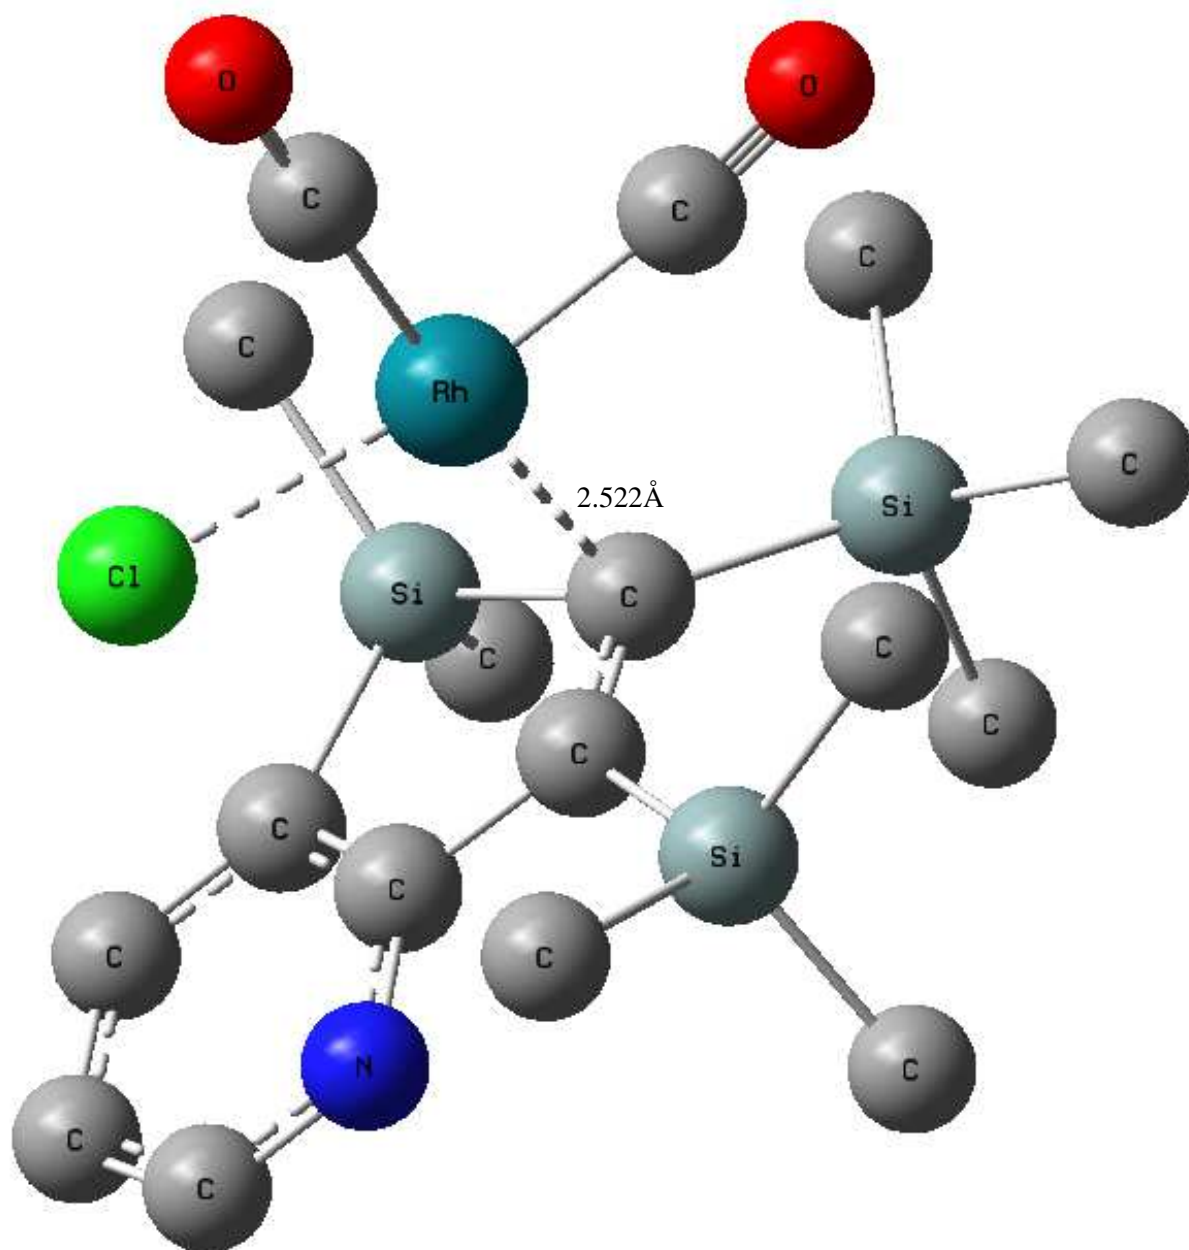

**Figure S29.** Optimized structure of **model 3(2)** with  $\text{RhCl}(\text{CO})_2$  model.

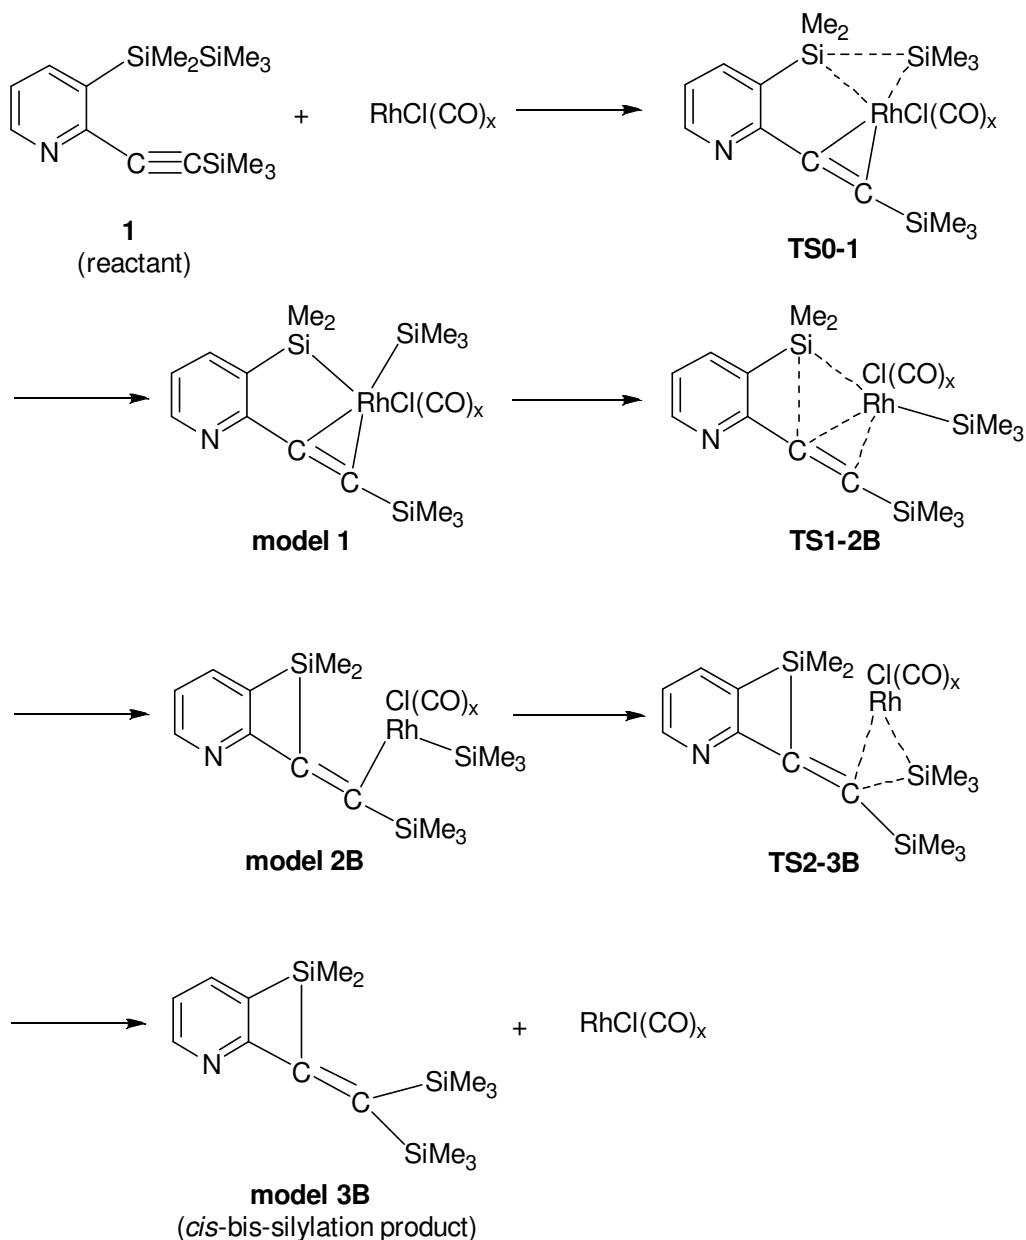

**Scheme S1.** Proposed Mechanism for Production of *cis*-bis-silylation product. The structures from **model 0** to **model 1** are common to *trans*-bis-silylation product formation route. Each LM and TS names are discriminated by adding suffix “B” from those on *trans*-bis-silylation product formation route.

From **Figures S30 to S33**, LM and TS structures on cis route with RhCl(CO) model are drawn.

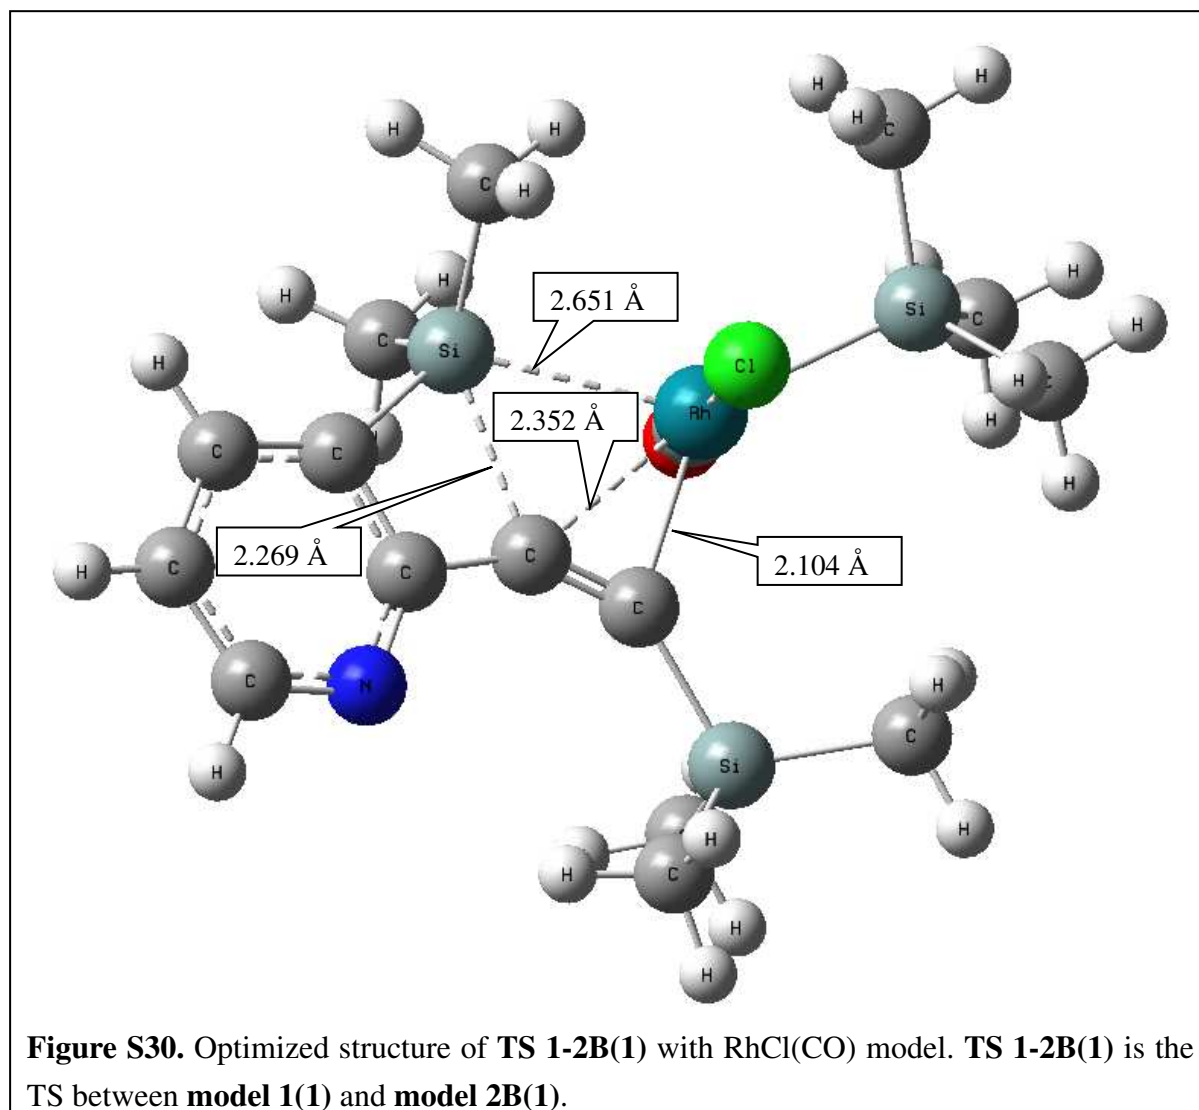



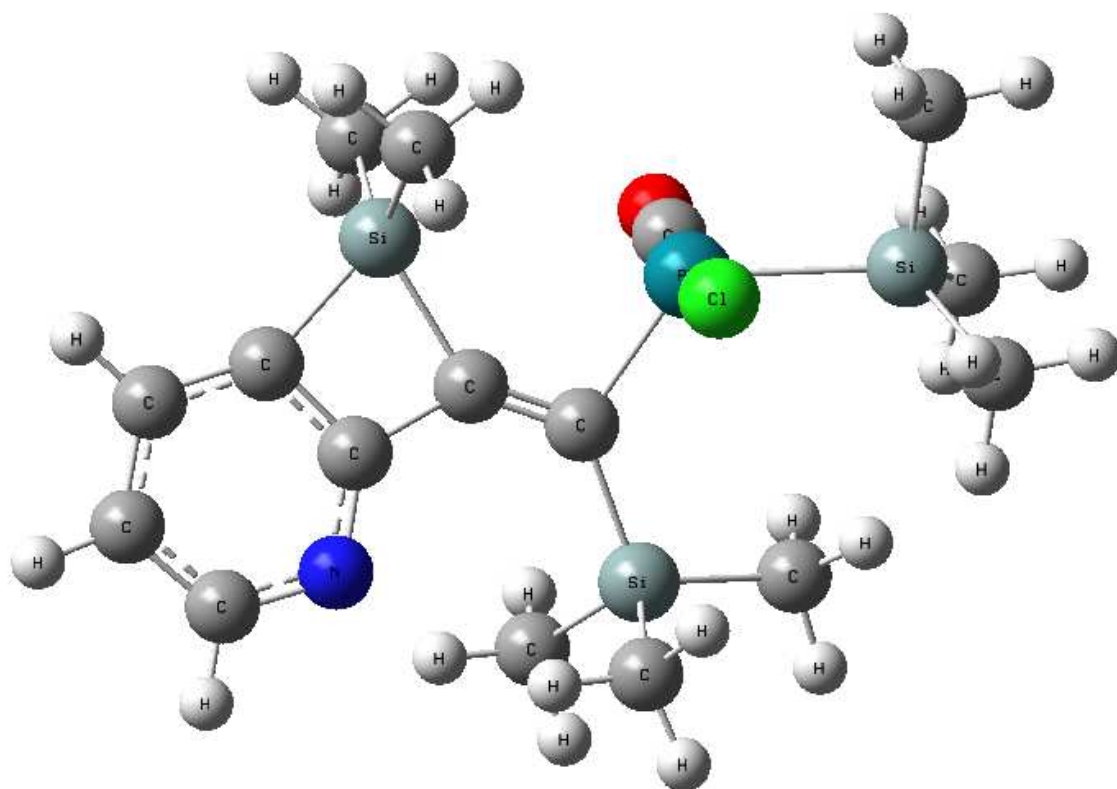

**Figure S31.** Optimized structure of **model 2B(1)** with RhCl(CO) model.

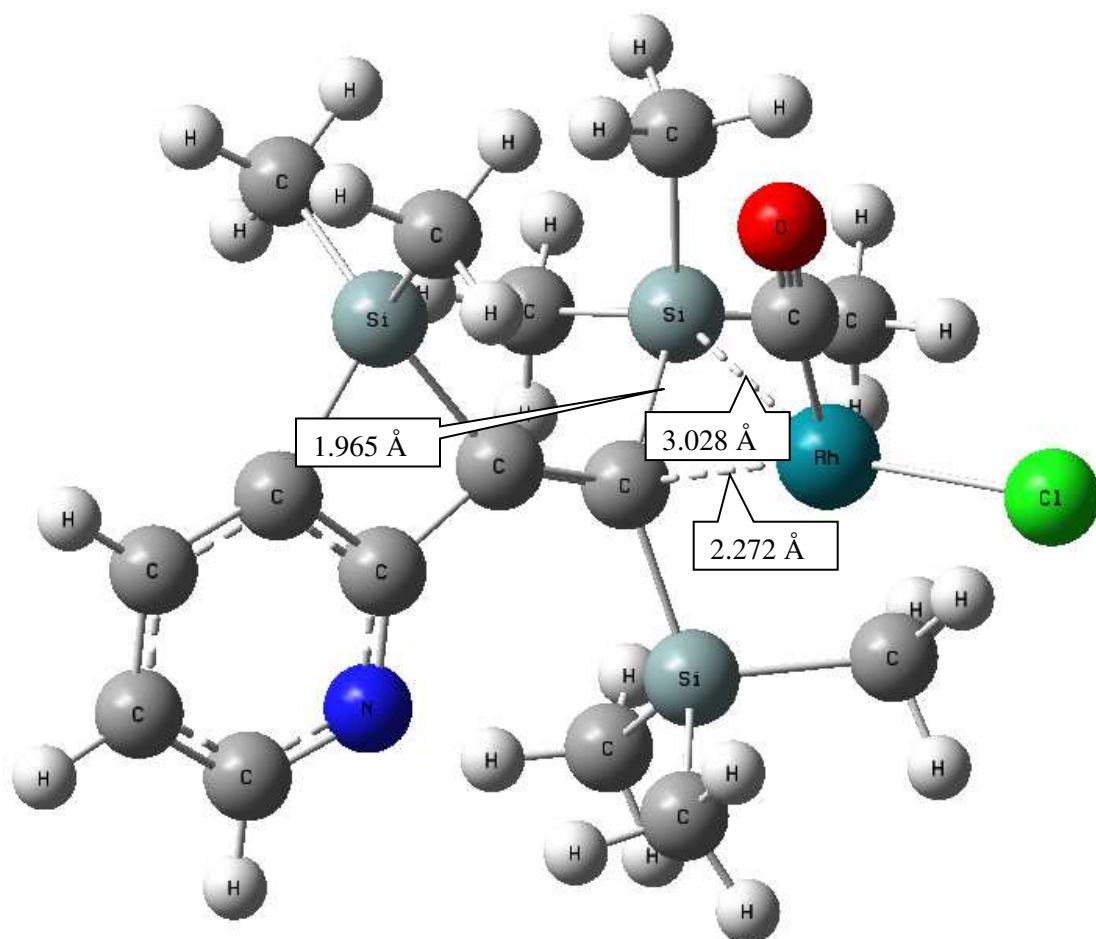

**Figure S32.** Optimized structure of TS 2-3B(1) with RhCl(CO) model. TS 2-3B(1) is the TS between **model 2B(1)** and **model 3B(1)**.

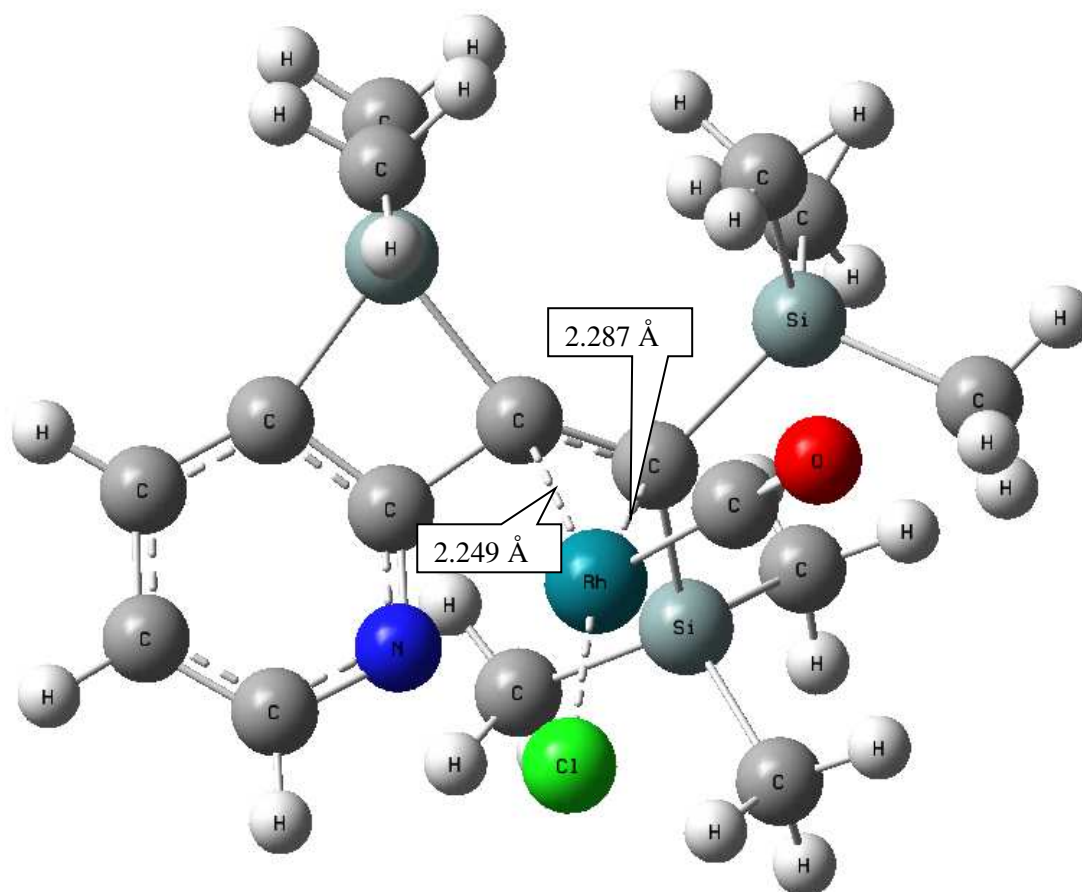

**Figure S33.** Optimized structure of **model 3B(1)** corresponding to combined structure of *cis*-bis-silylation product and RhCl(CO).

From **Figures S34** to **S37**, LM and TS structures on cis route with  $\text{RhCl}(\text{CO})_2$  model are drawn. For clarity of figures, H atoms are omitted in the drawing.

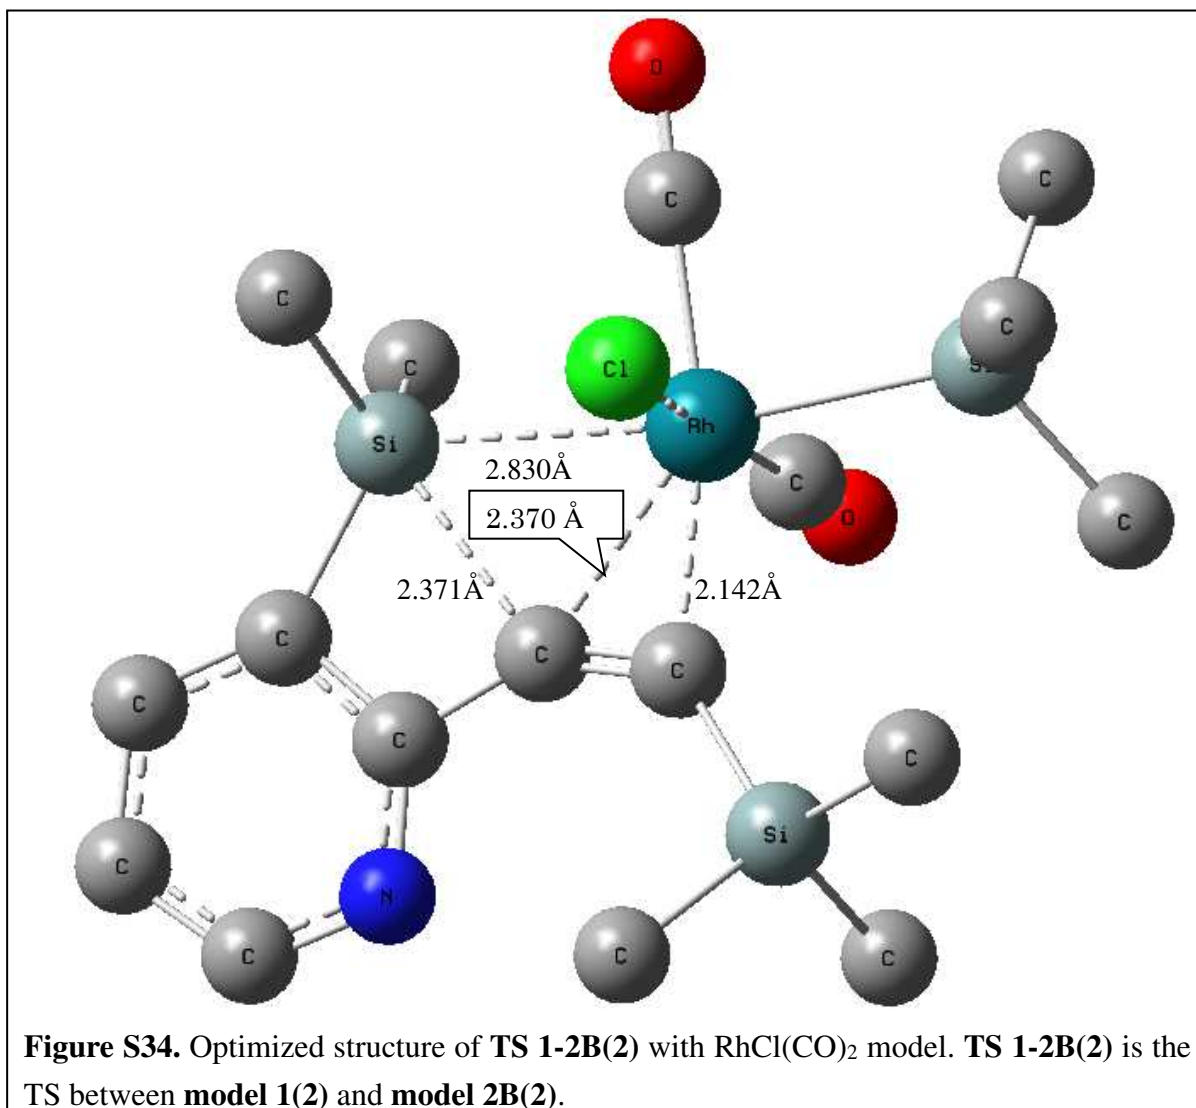

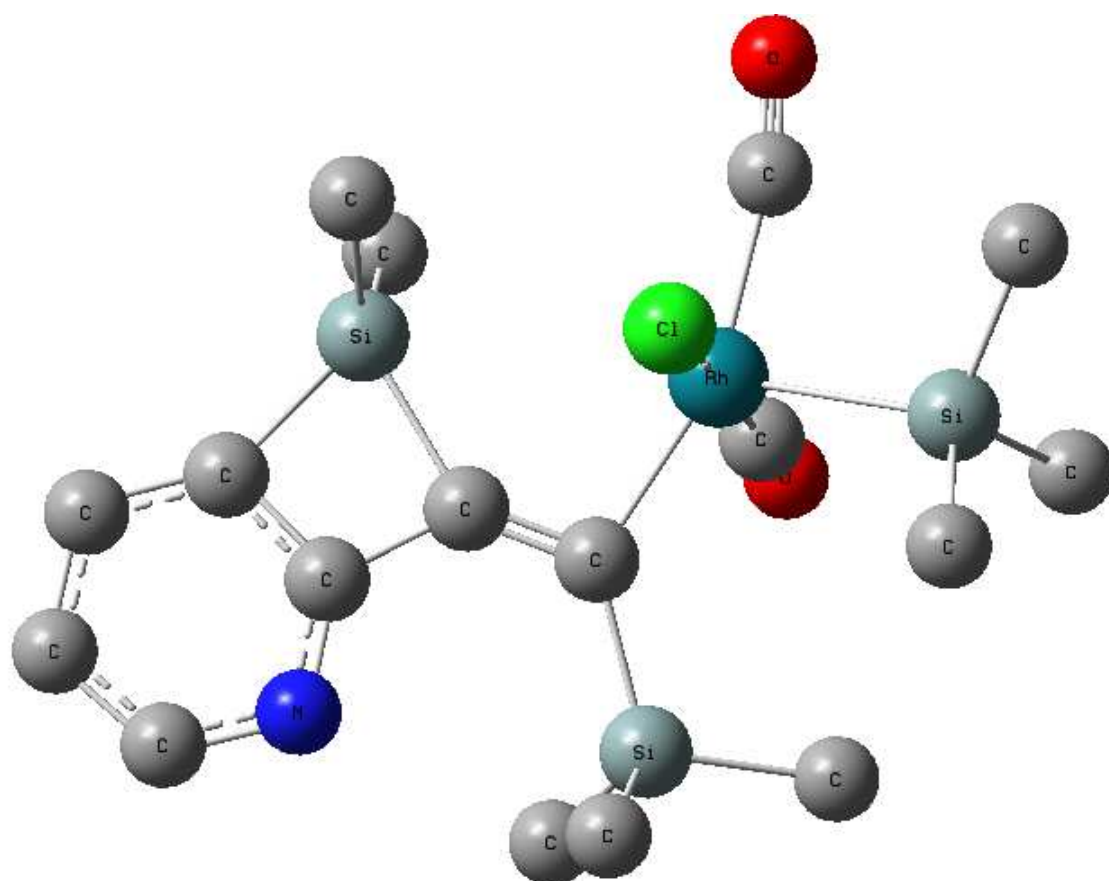

**Figure S35.** Optimized structure of **model 2B(2)** with RhCl(CO)<sub>2</sub> model.

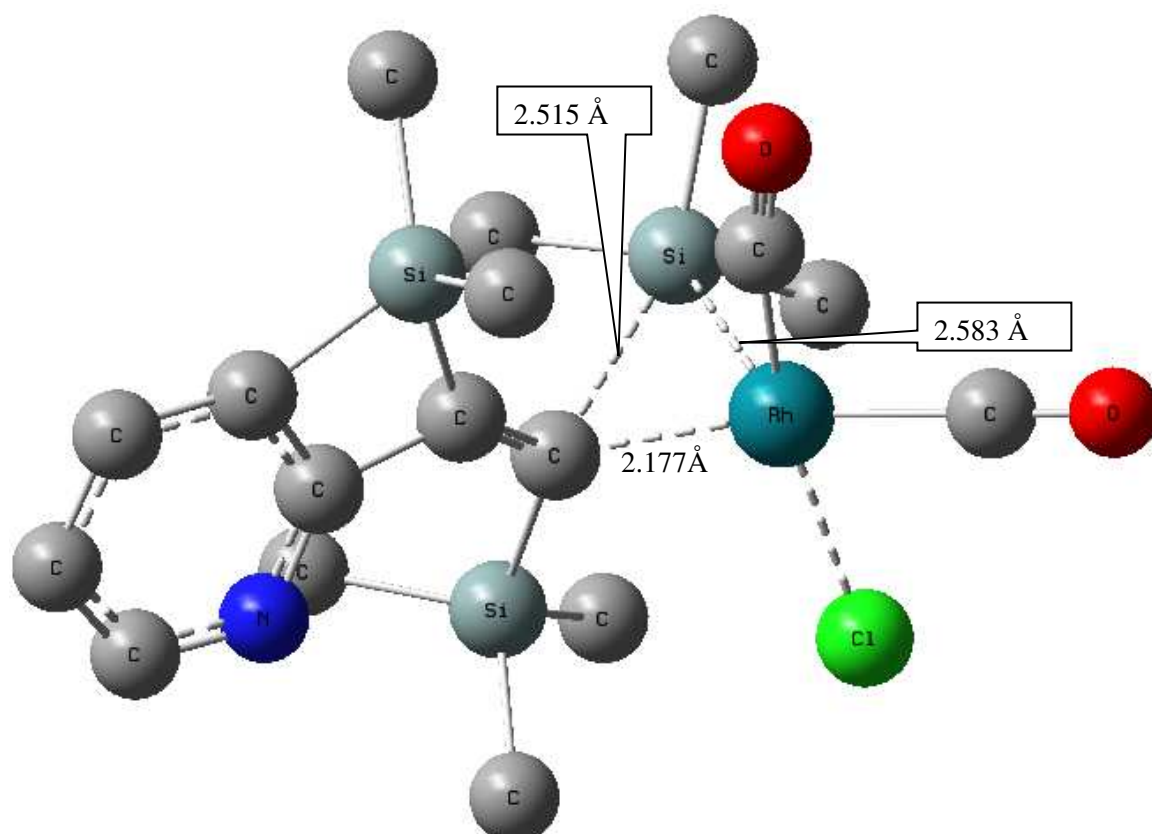

**Figure S36.** Optimized structure of **TS 2-3B(2)** with  $\text{RhCl(CO)}_2$  model. **TS 2-3B(2)** is the TS between **model 2B(2)** and **model 3B(2)**.

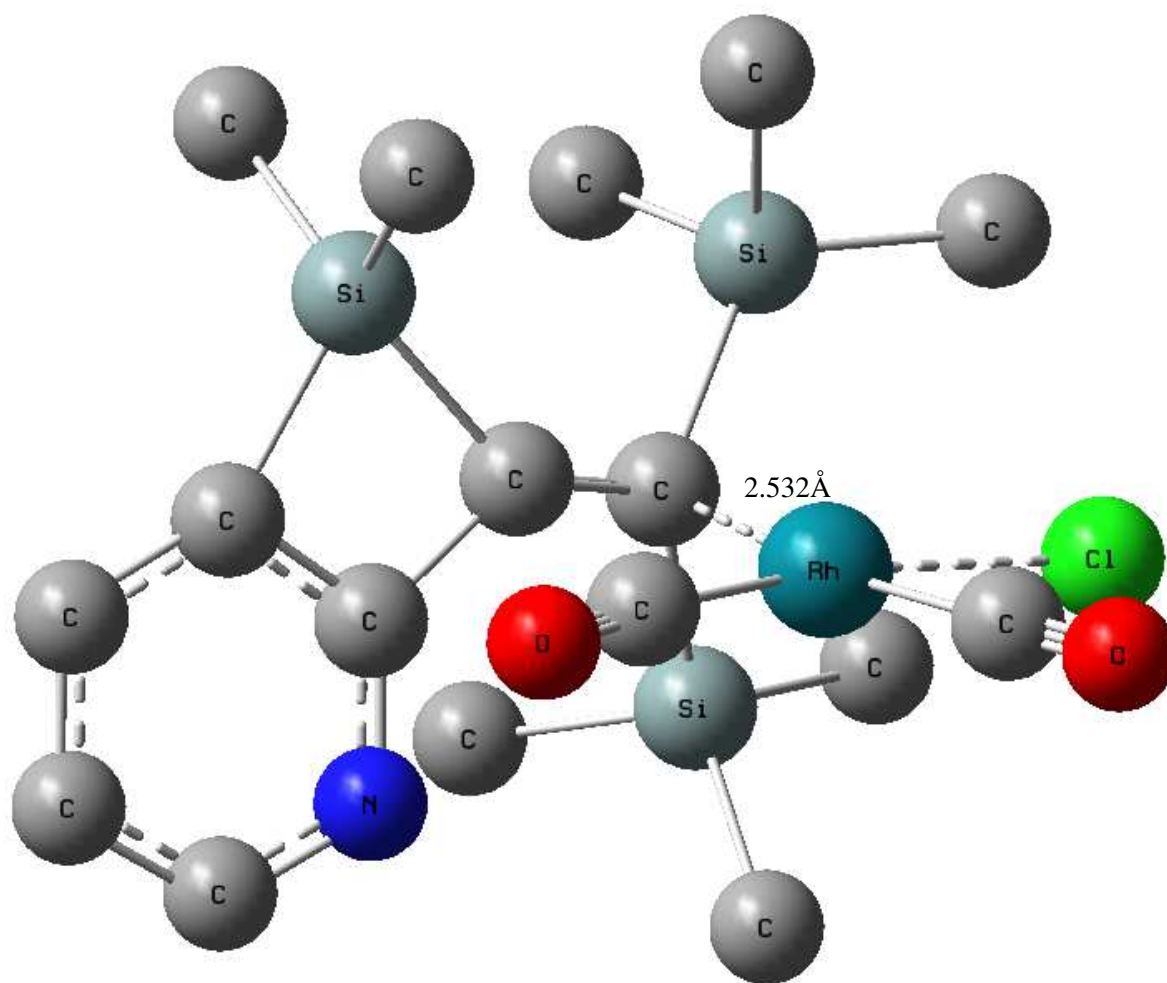

**Figure S37.** Optimized structure of **model 3B(2)** corresponding to combined structure of *cis*-bis-silylation product and  $\text{RhCl}(\text{CO})_2$ .
